# Supplementary material
Source: publisher figshare collection journal article supplement (https://gsapubs.figshare.com/ndownloader/files/26885651)
Supplement: Supplementary file 1 [file 26885651]

## Sheet: PlotDat2
Source sheet	Sheet1	0.0209609	0.0673914	0.0195	0.0690553	0.0216818	0.067323	0.0222559	0.0687632	0.0218056	0.0682727	0.0220931	0.0678088	0.0221221	0.0666676	0.021847	0.0693927	0.021899	0.0684778	0.0220007	0.0676118	0.0217685	0.067536	0.0221673	0.0685358	0.0217317	0.0677158	0.022223	0.0683605	0.0218865	0.0673042	0.0219929	0.0687889	0.0222604	0.0678727	0.021693	0.0682086	0.0223125	0.0680805	0.0216474	0.0679969	0.0216377	0.0668434	0.0224085	0.0692162	0.0217641	0.0675386	0.0223074	0.0685316
Plot name	Concordia1	0.0215391	0.0688226	0.023	0.0671399	0.0217033	0.0675819	0.0222749	0.0690299	0.0218264	0.0685235	0.0221225	0.0681923	0.0221454	0.0669093	0.0218688	0.0696428	0.0219203	0.0687407	0.0220297	0.0680333	0.021801	0.0679271	0.0221939	0.0688397	0.0217651	0.0681337	0.0222461	0.0686426	0.0219072	0.0675892	0.0220196	0.0691492	0.0222811	0.0681325	0.0217137	0.0684705	0.0223423	0.0685403	0.0216704	0.068244	0.0216617	0.0671241	0.0224338	0.0694947	0.0217841	0.0678071	0.0223336	0.0688408
Plot Type	1	0.0210972	0.06834			0.0217184	0.0678392	0.0222876	0.0692948	0.0218409	0.0687728	0.022138	0.0685697	0.0221619	0.0671497	0.0218843	0.0698913	0.0219355	0.0690021	0.0220447	0.0684477	0.0218195	0.0683119	0.0222137	0.0691416	0.0217843	0.0685449	0.0222625	0.068923	0.0219216	0.0678723	0.0220327	0.0695037	0.0222953	0.0683906	0.0217281	0.0687307	0.022358	0.0689923	0.0216867	0.0684896	0.0216787	0.067403	0.0224524	0.0697716	0.0217973	0.0680738	0.0223528	0.069148
1st free col	79	0.0214028	0.067874			0.0217271	0.0680926	0.0222939	0.0695557	0.0218492	0.0690184	0.0221391	0.0689335	0.0221716	0.0673868	0.0218935	0.0701362	0.0219443	0.0692595	0.0220453	0.0688471	0.0218238	0.0686829	0.0222268	0.069439	0.021789	0.0689412	0.022272	0.0691991	0.0219297	0.0681511	0.0220321	0.0698454	0.0223029	0.0686449	0.021736	0.068987	0.0223592	0.0694276	0.0216961	0.0687318	0.0216886	0.0676778	0.0224642	0.0700444	0.0218036	0.0683365	0.0223648	0.0694506
Sigma Level	1	0.0213582	0.0667515			0.0217292	0.0683401	0.0222938	0.0698103	0.021851	0.0692582	0.0221259	0.0692767	0.0221744	0.0676184	0.0218963	0.0703754	0.0219467	0.0695107	0.0220315	0.0692235	0.0218137	0.0690329	0.0222329	0.0697293	0.0217791	0.0693149	0.0222746	0.0694687	0.0219313	0.0684232	0.0220178	0.0701678	0.0223039	0.0688932	0.0217376	0.0692372	0.022346	0.0698377	0.0216986	0.0689683	0.0216912	0.0679462	0.0224692	0.0703108	0.0218029	0.0685929	0.0223696	0.069746
Absolute Errs	TRUE	0.0211418	0.0694625			0.0217248	0.0685795	0.0222873	0.0700566	0.0218464	0.0694902	0.0220987	0.0695926	0.0221702	0.0678426	0.0218927	0.0706068	0.0219427	0.0697538	0.0220037	0.0695697	0.0217894	0.0693551	0.0222321	0.07001	0.0217548	0.0696588	0.0222703	0.0697295	0.0219265	0.0686862	0.0219899	0.0704646	0.0222982	0.0691333	0.0217326	0.0694792	0.0223185	0.0702148	0.0216941	0.0691973	0.0216867	0.0682059	0.0224672	0.0705685	0.0217954	0.068841	0.022367	0.0700317
Symbol Type	1	0.0211932	0.0685432			0.0217138	0.0688087	0.0222744	0.0702922	0.0218354	0.0697124	0.0220579	0.0698751	0.022159	0.0680575	0.0218826	0.0708284	0.0219323	0.0699865	0.0219622	0.069879	0.0217514	0.0696433	0.0222242	0.0702788	0.0217165	0.0699662	0.0222591	0.0699791	0.0219152	0.0689379	0.0219491	0.0707299	0.0222859	0.0693633	0.0217211	0.0697109	0.0222773	0.0705514	0.0216827	0.0694167	0.0216749	0.0684546	0.0224583	0.0708153	0.0217809	0.0690785	0.0223572	0.0703052
Inverse Plot	FALSE	0.0213068	0.0676708			0.0216964	0.0690259	0.0222552	0.0705154	0.0218181	0.0699228	0.0220043	0.0701186	0.0221411	0.0682612	0.0218662	0.0710383	0.0219156	0.0702069	0.021908	0.0701452	0.0217005	0.0698917	0.0222095	0.0705334	0.021665	0.0702311	0.0222411	0.0702156	0.0218977	0.0691762	0.0218961	0.0709587	0.0222671	0.0695811	0.0217034	0.0699304	0.0222233	0.0708409	0.0216645	0.0696247	0.021656	0.0686901	0.0224426	0.0710491	0.0217596	0.0693035	0.0223401	0.0705643
Color Plot	TRUE	0.0210861	0.0676043			0.0216728	0.0692291	0.0222299	0.0707241	0.0217946	0.0701198	0.021939	0.0703184	0.0221164	0.0684521	0.0218437	0.0712349	0.0218927	0.0704131	0.0218421	0.0703633	0.0216377	0.0700956	0.0221879	0.0707715	0.0216013	0.0704483	0.0222165	0.0704369	0.0218739	0.069399	0.0218321	0.0711464	0.022242	0.0697849	0.0216794	0.0701357	0.0221574	0.0710778	0.0216397	0.0698195	0.0216302	0.0689106	0.0224202	0.0712679	0.0217318	0.069514	0.022316	0.0708066
3D plot	FALSE	0.0214139	0.0686097			0.0216431	0.0694166	0.0221987	0.0709165	0.0217652	0.0703016	0.0218633	0.0704706	0.0220853	0.0686285	0.0218151	0.0714163	0.0218639	0.0706033	0.0217658	0.0705291	0.0215641	0.0702511	0.0221598	0.0709912	0.0215267	0.0706137	0.0221854	0.070641	0.0218443	0.0696045	0.0217581	0.0712894	0.0222107	0.069973	0.0216494	0.0703251	0.022081	0.0712575	0.0216084	0.0699994	0.0215977	0.0691142	0.0223912	0.0714699	0.0216976	0.0697082	0.022285	0.0710302
Linear	FALSE	0.021038	0.0677825			0.0216075	0.0695868	0.0221619	0.0710912	0.0217301	0.0704666	0.0217786	0.0705723	0.022048	0.0687888	0.0217808	0.071581	0.0218293	0.070776	0.0216806	0.0706391	0.0214812	0.070355	0.0221253	0.0711906	0.0214425	0.0707239	0.0221481	0.0708263	0.0218089	0.0697908	0.0216757	0.071385	0.0221736	0.0701438	0.0216137	0.0704971	0.0219956	0.0713764	0.021571	0.070163	0.0215587	0.069299	0.0223561	0.0716533	0.0216574	0.0698844	0.0222474	0.0712332
Data Range	G145:K180	0.021462	0.0684315			0.0215665	0.0697384	0.0221197	0.0712464	0.0216896	0.0706135	0.0216866	0.0706215	0.0220048	0.0689318	0.0217411	0.0717276	0.0217893	0.0709296	0.021588	0.0706914	0.0213906	0.0704054	0.0220847	0.071368	0.0213505	0.0707769	0.022105	0.0709912	0.0217681	0.0699564	0.0215865	0.0714312	0.0221309	0.0702957	0.0215725	0.07065	0.0219027	0.0714322	0.0215277	0.0703087	0.0215137	0.0694635	0.0223149	0.0718166	0.0216115	0.0700413	0.0222035	0.0714137
Filled Symbols	FALSE	0.0211752	0.0673634			0.0215202	0.0698699	0.0220727	0.071381	0.0216441	0.070741	0.0215891	0.0706172	0.021956	0.0690562	0.0216962	0.071855	0.0217443	0.0710629	0.02149	0.0706849	0.0212941	0.0704013	0.0220384	0.0715218	0.0212524	0.0707716	0.0220564	0.0711342	0.0217222	0.0700999	0.0214922	0.0714273	0.022083	0.0704276	0.0215263	0.0707827	0.0218043	0.0714239	0.0214788	0.0704355	0.0214629	0.0696064	0.0222681	0.0719584	0.0215602	0.0701773	0.0221537	0.0715703
ConcAge	FALSE	0.0213248	0.0688506			0.0214693	0.0699802	0.022021	0.0714937	0.0215939	0.070848	0.021488	0.0705595	0.0219022	0.0691609	0.0216467	0.0719619	0.0216945	0.0711746	0.0213885	0.0706197	0.0211935	0.0703427	0.0219867	0.0716508	0.0211501	0.0707081	0.0220027	0.0712541	0.0216717	0.0702201	0.0213946	0.0713731	0.0220304	0.0705382	0.0214753	0.070894	0.0217022	0.0713516	0.021425	0.0705421	0.0214068	0.0697263	0.0222161	0.0720774	0.0215041	0.0702914	0.0220985	0.0717017
ConcSwap	FALSE	0.0215234	0.0679404			0.0214139	0.0700685	0.0219653	0.0715837	0.0215394	0.0709336	0.0213852	0.0704495	0.0218437	0.069245	0.0215928	0.0720475	0.0216404	0.0712639	0.0212853	0.0704972	0.0210908	0.0702308	0.0219302	0.0717538	0.0210456	0.0705877	0.0219445	0.07135	0.0216169	0.0703159	0.0212957	0.0712699	0.0219734	0.0706267	0.0214202	0.0709829	0.0215984	0.0712167	0.0213665	0.0706277	0.0213459	0.0698223	0.0221594	0.0721726	0.0214436	0.0703826	0.0220382	0.0718066
1st Symbol-row	1	0.0209766	0.0682736			0.0213547	0.0701339	0.0219059	0.0716501	0.0214812	0.0709971	0.0212827	0.0702894	0.0217811	0.0693079	0.021535	0.072111	0.0215826	0.07133	0.0211826	0.0703196	0.0209881	0.0700678	0.0218693	0.07183	0.020941	0.0704127	0.0218821	0.071421	0.0215584	0.0703865	0.0211973	0.0711196	0.0219126	0.0706922	0.0213612	0.0710487	0.0214949	0.0710218	0.0213039	0.0706915	0.0212807	0.0698935	0.0220984	0.0722433	0.0213792	0.0704502	0.0219735	0.0718842
		0.0216157	0.068136			0.0212922	0.0701759	0.0218434	0.0716924	0.0214197	0.0710379	0.0211826	0.0700823	0.0217149	0.069349	0.0214739	0.0721519	0.0215214	0.0713724	0.0210823	0.0700905	0.0208873	0.0698569	0.0218045	0.0718788	0.0208383	0.0701865	0.0218161	0.0714665	0.0214966	0.0704313	0.0211015	0.0709251	0.0218484	0.0707343	0.0212989	0.0710908	0.0213938	0.0707707	0.0212377	0.0707331	0.0212118	0.0699394	0.0220336	0.0722888	0.0213114	0.0704934	0.0219048	0.0719339
		0.0208843	0.068078			0.0212268	0.0701942	0.0217782	0.0717102	0.0213554	0.0710557	0.0210868	0.0698322	0.0216457	0.0693679	0.02141	0.0721699	0.0214574	0.0713905	0.0209863	0.0698142	0.0207903	0.0696021	0.0217363	0.0718996	0.0207394	0.0699135	0.0217471	0.0714861	0.0214321	0.0704499	0.0210099	0.0706902	0.0217815	0.0707525	0.0212339	0.0711089	0.021297	0.0704684	0.0211685	0.0707519	0.0211397	0.0699595	0.0219655	0.0723088	0.0212409	0.070512	0.0218328	0.0719553
		0.0208428	0.066921			0.0211591	0.0701885	0.0217111	0.0717033	0.021289	0.0710503	0.0209971	0.069544	0.0215739	0.0693644	0.0213438	0.0721648	0.0213911	0.0713844	0.0208966	0.0694963	0.0206991	0.0693084	0.0216655	0.0718924	0.0206464	0.069599	0.0216756	0.0714796	0.0213654	0.0704422	0.0209245	0.0704195	0.0217124	0.0707468	0.0211667	0.0711028	0.0212065	0.0701207	0.0210969	0.070748	0.0210651	0.0699537	0.0218949	0.072303	0.0211682	0.0705059	0.021758	0.071948
		0.0216572	0.069293			0.0210898	0.070159	0.0216425	0.0716719	0.0212209	0.0710218	0.0209153	0.0692233	0.0215004	0.0693387	0.0212758	0.0721367	0.0213232	0.0713541	0.0208149	0.0691428	0.0206154	0.0689816	0.0215924	0.0718572	0.020561	0.0692491	0.0216024	0.0714471	0.021297	0.0704082	0.0208469	0.0701183	0.0216417	0.0707171	0.0210979	0.0710726	0.0211238	0.0697343	0.0210234	0.0707213	0.0209886	0.069922	0.0218222	0.0722715	0.021094	0.0704749	0.0216811	0.0719123
		0.0209882	0.0676061			0.0210193	0.0701059	0.021573	0.0716162	0.0211517	0.0709705	0.020843	0.0688763	0.0214256	0.0692909	0.0212068	0.0720857	0.0212541	0.0712998	0.0207427	0.0687607	0.0205409	0.068628	0.0215178	0.0717942	0.0204849	0.0688708	0.0215279	0.0713889	0.0212276	0.0703483	0.0207786	0.0697925	0.02157	0.0706637	0.0210281	0.0710185	0.0210508	0.0693169	0.0209488	0.0706721	0.0209108	0.0698648	0.0217482	0.0722147	0.0210189	0.0704196	0.0216028	0.0718484
		0.0215118	0.0686079			0.0209484	0.0700296	0.0215032	0.0715366	0.0210821	0.0708966	0.0207816	0.0685098	0.0213503	0.0692215	0.0211371	0.0720124	0.0211846	0.0712219	0.0206816	0.0683573	0.020477	0.0682544	0.0214424	0.0717041	0.0204195	0.0684712	0.0214529	0.0713055	0.0211578	0.0702629	0.0207209	0.0694482	0.0214979	0.0705871	0.0209578	0.0709409	0.0209887	0.0688764	0.0208736	0.0706007	0.0208325	0.0697824	0.0216733	0.0721329	0.0209436	0.0703402	0.0215237	0.0717568
		0.0208294	0.0677769			0.0208776	0.0699308	0.0214337	0.0714339	0.0210126	0.070801	0.0207323	0.068131	0.021275	0.069131	0.0210675	0.0719172	0.0211151	0.0711212	0.0206326	0.0679406	0.0204249	0.0678682	0.0213667	0.0715876	0.0203662	0.0680582	0.0213779	0.0711975	0.0210881	0.0701527	0.020675	0.0690924	0.0214259	0.0704879	0.0208877	0.0708407	0.0209389	0.0684216	0.0207985	0.0705078	0.0207543	0.0696756	0.0215983	0.0720268	0.0208686	0.0702375	0.0214445	0.0716383
		0.0216706	0.0684371			0.0208074	0.0698104	0.0213651	0.0713089	0.0209439	0.0706844	0.020696	0.0677471	0.0212005	0.0690202	0.0209986	0.0718012	0.0210463	0.0709985	0.0205967	0.0675186	0.0203858	0.0674768	0.0212914	0.0714457	0.020326	0.0676399	0.0213037	0.0710659	0.0210191	0.0700188	0.0206417	0.0687318	0.0213549	0.070367	0.0208183	0.0707185	0.0209022	0.0679612	0.0207242	0.0703941	0.0206768	0.0695453	0.0215238	0.0718975	0.0207946	0.0701123	0.0213659	0.071494
		0.0211246	0.0692587			0.0207386	0.0696693	0.021298	0.0711627	0.0208764	0.0705478	0.0206735	0.0673657	0.0211272	0.06889	0.0209308	0.0716652	0.0209787	0.0708549	0.0205746	0.0670996	0.0203602	0.0670879	0.0212172	0.0712796	0.0202996	0.0672243	0.0212308	0.0709119	0.0209515	0.0698622	0.0206217	0.0683736	0.0212852	0.0702253	0.0207503	0.0705754	0.0208794	0.0675041	0.0206512	0.0702607	0.0206007	0.0693926	0.0214505	0.0717459	0.0207223	0.0699657	0.0212885	0.0713251
		0.0213754	0.0669553			0.0206717	0.0695087	0.0212329	0.0709965	0.0208108	0.0703923	0.0206652	0.0669942	0.021056	0.0687415	0.0208649	0.0715104	0.0209129	0.0706915	0.0205668	0.0666917	0.0203488	0.0667091	0.0211446	0.0710907	0.0202876	0.0668196	0.0211599	0.0707367	0.0208858	0.0696842	0.0206154	0.0680247	0.0212176	0.0700642	0.0206842	0.0704127	0.020871	0.0670594	0.0205802	0.0701087	0.0205267	0.0692188	0.0213789	0.0715734	0.0206523	0.0697991	0.021213	0.071133
		0.0210907	0.0674114			0.0206072	0.0693302	0.0211705	0.0708118	0.0207477	0.0702193	0.0206712	0.0666398	0.0209873	0.0685761	0.0208013	0.0713381	0.0208496	0.0705098	0.0205734	0.0663029	0.0203517	0.0663477	0.0210743	0.0708807	0.0202902	0.0664337	0.0210916	0.0705418	0.0208226	0.0694865	0.0206229	0.0676918	0.0211526	0.0698849	0.0206206	0.0702318	0.020877	0.0666357	0.0205118	0.0699394	0.0204554	0.0690254	0.0213097	0.0713815	0.0205851	0.0696137	0.0211401	0.0709194
		0.0214093	0.0688026			0.0205458	0.069135	0.0211112	0.0706101	0.0206876	0.0700303	0.0206915	0.0663095	0.0209218	0.0683952	0.0207406	0.0711499	0.0207892	0.0703114	0.0205943	0.0659407	0.020369	0.0660108	0.021007	0.0706512	0.0203073	0.066074	0.0210264	0.070329	0.0207624	0.0692707	0.0206441	0.0673814	0.0210908	0.0696891	0.02056	0.0700341	0.0208974	0.0662411	0.0204466	0.0697541	0.0203874	0.0688141	0.0212434	0.0711717	0.0205213	0.0694112	0.0210703	0.070686
		0.0211483	0.0696912			0.0204879	0.068925	0.0210556	0.0703932	0.0206309	0.0698269	0.0207256	0.0660096	0.02086	0.0682002	0.0206834	0.0709472	0.0207322	0.0700978	0.020629	0.0656122	0.0204001	0.0657049	0.0209431	0.0704044	0.0203387	0.0657475	0.020965	0.0700999	0.0207056	0.0690386	0.0206785	0.0670997	0.0210326	0.0694783	0.020503	0.0698215	0.0209318	0.0658834	0.0203851	0.0695546	0.0203233	0.0685866	0.0211807	0.0709459	0.0204616	0.0691932	0.0210043	0.0704349
		0.0213517	0.0665228			0.0204341	0.0687019	0.0210041	0.0701628	0.0205782	0.0696108	0.0207729	0.065746	0.0208025	0.0679928	0.02063	0.0707319	0.0206792	0.069871	0.020677	0.0653237	0.0204447	0.0654359	0.0208832	0.0701422	0.0203837	0.0654607	0.0209078	0.0698566	0.0206529	0.0687922	0.0207255	0.0668521	0.0209787	0.0692544	0.0204501	0.0695956	0.0209795	0.0655696	0.0203279	0.0693425	0.0202636	0.0683449	0.0211221	0.070706	0.0204063	0.0689618	0.0209427	0.0701682
		0.0215091	0.0683055			0.0203847	0.0684677	0.0209571	0.0699211	0.02053	0.0693838	0.0208325	0.0655238	0.0207497	0.0677749	0.020581	0.0705057	0.0206305	0.0696329	0.0207372	0.0650809	0.0205017	0.0652092	0.0208278	0.069867	0.0204415	0.065219	0.0208553	0.0696012	0.0206047	0.0685336	0.0207842	0.0666433	0.0209294	0.0690194	0.0204016	0.0693585	0.0210396	0.0653057	0.0202754	0.0691196	0.0202089	0.0680911	0.021068	0.070454	0.020356	0.0687188	0.0208859	0.0698882
		0.0209909	0.0679085			0.0203403	0.0682242	0.0209151	0.0696699	0.0204866	0.069148	0.0209032	0.0653473	0.0207021	0.0675482	0.0205368	0.0702706	0.0205867	0.0693854	0.0208085	0.0648885	0.0205701	0.065029	0.0207775	0.069581	0.0205108	0.0650273	0.020808	0.0693358	0.0205613	0.068265	0.0208533	0.0664775	0.0208851	0.0687751	0.020358	0.0691121	0.0211109	0.0650969	0.0202281	0.0688878	0.0201596	0.0678272	0.0210189	0.0701922	0.0203111	0.0684662	0.0208344	0.0695973
		0.0212016	0.067021			0.0203011	0.0679736	0.0208785	0.0694115	0.0204484	0.0689052	0.0209835	0.06522	0.0206601	0.0673147	0.0204978	0.0700287	0.020548	0.0691308	0.0208894	0.0647503	0.0206485	0.064899	0.0207325	0.0692868	0.0205904	0.0648892	0.0207662	0.0690626	0.0205232	0.0679887	0.0209317	0.0663579	0.0208463	0.0685236	0.0203197	0.0688585	0.021192	0.0649473	0.0201864	0.0686491	0.0201161	0.0675557	0.0209753	0.0699226	0.020272	0.0682064	0.0207887	0.0692979
		0.0212984	0.069193			0.0202676	0.0677181	0.0208474	0.0691481	0.0204157	0.0686576	0.0210721	0.0651444	0.0206241	0.0670765	0.0204643	0.0697819	0.0205148	0.0688712	0.0209785	0.0646689	0.0207355	0.0648217	0.0206934	0.0689868	0.0206787	0.0648073	0.0207304	0.0687841	0.0204906	0.0677071	0.0210177	0.0662869	0.0208133	0.0682672	0.0202871	0.0686	0.0212814	0.0648597	0.0201507	0.0684055	0.0200788	0.0672787	0.0209375	0.0696477	0.020239	0.0679414	0.0207492	0.0689927
		0.0209812	0.0675408			0.02024	0.0674598	0.0208223	0.068882	0.0203889	0.0684074	0.0211671	0.0651219	0.0205943	0.0668354	0.0204365	0.0695324	0.0204874	0.0686087	0.021074	0.064646	0.0208293	0.0647985	0.0206604	0.0686835	0.020774	0.0647834	0.0207009	0.0685025	0.0204639	0.0674226	0.0211097	0.0662657	0.0207863	0.0680081	0.0202603	0.0683386	0.0213773	0.0648359	0.0201212	0.0681591	0.020048	0.0669987	0.0209058	0.0693698	0.0202124	0.0676736	0.0207162	0.0686842
		0.0215188	0.0686732			0.0202185	0.0672009	0.0208033	0.0686153	0.0203681	0.0681565	0.0212666	0.065153	0.020571	0.0665936	0.0204148	0.0692823	0.020466	0.0683457	0.0211741	0.0646819	0.0209281	0.0648299	0.0206339	0.0683796	0.0208745	0.0648179	0.0206778	0.0682204	0.0204432	0.0671376	0.0212059	0.0662948	0.0207657	0.0677483	0.0202396	0.0680767	0.0214778	0.0648763	0.0200982	0.067912	0.020024	0.066718	0.0208806	0.0690912	0.0201923	0.0674052	0.02069	0.068375
		IsoLine	IsoLine			0.0202034	0.0669436	0.0207906	0.0683504	0.0203535	0.0679072	0.0213689	0.065237	0.0205545	0.0663532	0.0203992	0.0690337	0.0204509	0.0680844	0.0212767	0.064776	0.0210299	0.0649154	0.020614	0.0680777	0.0209781	0.0649101	0.0206615	0.0679401	0.0204288	0.0668544	0.0213044	0.0663737	0.0207515	0.0674902	0.0202252	0.0678165	0.021581	0.0649802	0.020082	0.0676664	0.020007	0.066439	0.020862	0.0688143	0.0201791	0.0671385	0.0206708	0.0680678
						0.0201947	0.0666902	0.0207842	0.0680895	0.0203453	0.0676616	0.0214717	0.0653724	0.0205448	0.0661162	0.02039	0.0687888	0.0204421	0.067827	0.0213799	0.0649265	0.0211329	0.0650531	0.020601	0.0677803	0.0210829	0.0650582	0.0206519	0.0676639	0.0204207	0.0665757	0.0214033	0.0665008	0.0207438	0.0672359	0.0202172	0.0675602	0.0216849	0.0651455	0.0200726	0.0674243	0.0199971	0.0661642	0.0208501	0.0685416	0.0201728	0.0668758	0.0206588	0.0677652
						0.0201926	0.0664427	0.0207843	0.0678348	0.0203435	0.0674218	0.0215733	0.0655565	0.0205421	0.0658846	0.0203873	0.0685496	0.0204396	0.0675757	0.0214816	0.0651303	0.0212349	0.0652406	0.0205948	0.06749	0.0211868	0.0652593	0.0206493	0.0673943	0.0204191	0.0663036	0.0215006	0.0666736	0.0207429	0.0669876	0.0202157	0.06731	0.0217874	0.065369	0.0200701	0.0671877	0.0199944	0.0658958	0.0208452	0.0682752	0.0201735	0.0666193	0.020654	0.0674698
						0.0201971	0.0662033	0.0207909	0.0675886	0.0203481	0.0671898	0.0216715	0.0657856	0.0205463	0.0656604	0.0203909	0.0683183	0.0204436	0.0673327	0.02158	0.0653836	0.0213341	0.065474	0.0205957	0.0672093	0.0212879	0.0655095	0.0206536	0.0671336	0.0204239	0.0660406	0.0215946	0.0668888	0.0207485	0.0667475	0.0202206	0.067068	0.0218866	0.0656463	0.0200745	0.0669587	0.019999	0.0656362	0.0208472	0.0680175	0.0201811	0.0663712	0.0206566	0.0671841
						0.020208	0.0659741	0.0208038	0.0673529	0.0203591	0.0669676	0.0217645	0.0660554	0.0205574	0.0654455	0.020401	0.0680967	0.020454	0.0671	0.0216731	0.0656814	0.0214284	0.0657489	0.0206035	0.0669405	0.021384	0.065804	0.0206648	0.0668839	0.0204352	0.0657889	0.0216832	0.0671422	0.0207608	0.0665175	0.0202321	0.0668363	0.0219805	0.0659722	0.0200859	0.0667393	0.0200107	0.0653875	0.020856	0.0677707	0.0201955	0.0661337	0.0206664	0.0669106
						0.0202254	0.0657569	0.020823	0.0671298	0.0203764	0.0667572	0.0218504	0.0663606	0.0205754	0.0652417	0.0204173	0.0678867	0.0204708	0.0668796	0.021759	0.066018	0.021516	0.0660599	0.0206183	0.0666859	0.0214735	0.0661369	0.0206828	0.0666474	0.0204527	0.0655506	0.0217649	0.0674288	0.0207796	0.0662997	0.0202499	0.0666168	0.0220673	0.0663401	0.0201041	0.0665313	0.0200296	0.0651519	0.0208718	0.0675369	0.0202168	0.0659088	0.0206835	0.0666515
						0.020249	0.0655537	0.0208483	0.0669211	0.0203998	0.0665602	0.0219277	0.0666953	0.0206	0.0650509	0.0204399	0.0676902	0.0204936	0.0666734	0.0218361	0.0663867	0.0215953	0.066401	0.0206399	0.0664478	0.0215544	0.0665019	0.0207074	0.0664262	0.0204765	0.0653278	0.0218381	0.0677431	0.0208048	0.0660959	0.0202739	0.0664115	0.0221454	0.066743	0.0201289	0.0663365	0.0200554	0.0649314	0.0208942	0.067318	0.0202446	0.0656983	0.0207076	0.0664091
						0.0202788	0.0653662	0.0208795	0.0667286	0.0204292	0.0663785	0.0219947	0.0670529	0.0206312	0.0648745	0.0204684	0.0675088	0.0205225	0.0664832	0.0219029	0.0667804	0.0216647	0.0667655	0.020668	0.0662281	0.0216253	0.0668919	0.0207385	0.066222	0.0205062	0.0651223	0.0219012	0.068079	0.0208361	0.0659078	0.0203038	0.0662221	0.0222131	0.067173	0.0201602	0.0661566	0.0200879	0.0647279	0.0209231	0.067116	0.0202788	0.0655041	0.0207386	0.0661855
						0.0203143	0.065196	0.0209163	0.066554	0.0204643	0.0662134	0.0220502	0.0674265	0.0206685	0.0647141	0.0205027	0.0673441	0.020557	0.0663105	0.0219581	0.0671914	0.0217228	0.0671463	0.0207025	0.0660287	0.0216848	0.0672991	0.0207758	0.0660367	0.0205415	0.064936	0.0219532	0.0684299	0.0208732	0.065737	0.0203396	0.0660502	0.0222692	0.0676217	0.0201977	0.065993	0.0201269	0.0645431	0.0209583	0.0669326	0.020319	0.0653278	0.0207762	0.0659826
						0.0203554	0.0650445	0.0209584	0.0663988	0.0205048	0.0660665	0.0220931	0.0678088	0.0207117	0.0645712	0.0205425	0.0671974	0.020597	0.0661569	0.0220007	0.0676118	0.0217685	0.067536	0.0207431	0.0658513	0.0217317	0.0677158	0.0208189	0.0658719	0.0205823	0.0647704	0.0219929	0.0687889	0.0209159	0.0655851	0.0203807	0.0658972	0.0223125	0.0680805	0.020241	0.0658473	0.020172	0.0643785	0.0209995	0.0667693	0.0203649	0.065171	0.0208201	0.065802
						0.0204016	0.064913	0.0210055	0.0662642	0.0205504	0.065939			0.0207604	0.0644468	0.0205873	0.0670701	0.0206421	0.0660236					0.0207894	0.0656975			0.0208675	0.0657288	0.0206282	0.0646268			0.0209638	0.0654532	0.0204269	0.0657645			0.0202898	0.0657205	0.0202228	0.0642357	0.0210462	0.0666276	0.0204162	0.0650349	0.0208699	0.0656454
						0.0204526	0.0648026	0.0210572	0.0661514	0.0206006	0.065832			0.0208142	0.0643421	0.0206369	0.0669632	0.0206919	0.0659119					0.020841	0.0655685			0.0209212	0.0656089	0.0206787	0.0645067			0.0210164	0.0653426	0.0204779	0.0656532			0.0203437	0.0656139	0.0202789	0.0641158	0.0210982	0.0665086	0.0204723	0.0649208	0.0209251	0.0655141
						0.0205079	0.0647144	0.0211129	0.0660615	0.0206551	0.0657464			0.0208727	0.0642579	0.0206908	0.0668776	0.0207459	0.0658225					0.0208976	0.0654655			0.0209795	0.065513	0.0207335	0.0644109			0.0210734	0.0652541	0.0205331	0.0655643			0.0204021	0.0655283	0.0203398	0.0640198	0.021155	0.0664133	0.0205328	0.0648296	0.0209854	0.0654092
						0.0205671	0.0646489	0.0211723	0.0659951	0.0207133	0.0656829			0.0209353	0.0641951	0.0207485	0.066814	0.0208038	0.0657564					0.0209585	0.0653893			0.0210419	0.065442	0.020792	0.0643403			0.0211342	0.0651885	0.020592	0.0654985			0.0204648	0.0654645	0.0204049	0.0639485	0.021216	0.0663427	0.0205972	0.0647621	0.0210501	0.0653315
						0.0206297	0.0646069	0.0212348	0.0659528	0.0207748	0.0656421			0.0210015	0.064154	0.0208096	0.0667731	0.020865	0.0657141					0.0210233	0.0653405			0.0211078	0.0653965	0.0208538	0.0642955			0.0211983	0.0651465	0.0206543	0.0654564			0.0205309	0.065423	0.0204739	0.0639027	0.0212808	0.0662971	0.020665	0.0647188	0.0211188	0.0652818
						0.020695	0.0645886	0.0212999	0.065935	0.0208391	0.0656243			0.0210708	0.0641351	0.0208736	0.0667551	0.020929	0.0656959					0.0210914	0.0653197			0.0211768	0.0653769	0.0209183	0.0642769			0.0212652	0.0651282	0.0207193	0.0654383			0.0206001	0.0654041	0.0205459	0.0638825	0.0213488	0.0662772	0.0207355	0.0647002	0.0211908	0.0652605
						0.0207627	0.0645943	0.0213671	0.0659419	0.0209055	0.0656297			0.0211425	0.0641385	0.0209398	0.0667602	0.0209952	0.065702					0.0211623	0.0653269			0.0212483	0.0653834	0.0209851	0.0642846			0.0213343	0.065134	0.0207865	0.0654444			0.0206718	0.065408	0.0206206	0.0638883	0.0214195	0.066283	0.0208082	0.0647064	0.0212656	0.0652677
						0.020832	0.0646238	0.0214357	0.0659733	0.0209736	0.0656582			0.0212161	0.0641642	0.0210077	0.0667884	0.0210632	0.0657324					0.0212354	0.0653621			0.0213215	0.0654159	0.0210534	0.0643186			0.0214051	0.0651637	0.0208553	0.0654746			0.0207452	0.0654347	0.0206971	0.06392	0.0214921	0.0663144	0.0208824	0.0647373	0.0213425	0.0653035
						0.0209025	0.0646769	0.0215052	0.066029	0.0210428	0.0657096			0.0212908	0.064212	0.0210768	0.0668393	0.0211322	0.0657867					0.0213099	0.0654251			0.021396	0.0654741	0.0211228	0.0643785			0.0214768	0.0652171	0.0209251	0.0655287			0.0208198	0.0654839	0.0207748	0.0639773	0.0215662	0.0663713	0.0209575	0.0647927	0.0214208	0.0653674
						0.0209734	0.0647532	0.021575	0.0661086	0.0211124	0.0657834			0.0213662	0.0642815	0.0211464	0.0669127	0.0212018	0.0658645					0.0213854	0.0655152			0.021471	0.0655575	0.0211926	0.0644639			0.0215489	0.0652937	0.0209954	0.0656063			0.020895	0.0655553	0.0208531	0.0640597	0.0216411	0.0664531	0.0210328	0.0648721	0.0214999	0.065459
						0.0210443	0.064852	0.0216445	0.0662113	0.0211819	0.065879			0.0214414	0.064372	0.021216	0.0670078	0.0212713	0.0659652					0.0214611	0.0656317			0.021546	0.0656655	0.0212623	0.0645741			0.0216208	0.0653929	0.0210656	0.0657066			0.0209701	0.0656482	0.0209314	0.0641665	0.0217161	0.0665591	0.0211078	0.0649748	0.0215791	0.0655774
						0.0211144	0.0649725	0.0217131	0.0663363	0.0212506	0.0659956			0.021516	0.0644828	0.021285	0.0671238	0.0213401	0.0660879					0.0215364	0.0657736			0.0216202	0.0657971	0.0213313	0.064708			0.0216919	0.0655138	0.0211349	0.0658288			0.0210444	0.0657619	0.0210088	0.0642968	0.0217905	0.0666885	0.0211818	0.0650999	0.0216577	0.0657217
						0.0211832	0.0651135	0.0217802	0.0664825	0.0213181	0.0661323			0.0215892	0.064613	0.0213527	0.0672598	0.0214077	0.0662316					0.0216106	0.0659397			0.0216931	0.0659511	0.0213989	0.0648646			0.0217616	0.0656555	0.021203	0.0659718			0.0211174	0.0658953	0.0210849	0.0644495	0.0218639	0.06684	0.0212541	0.0652465	0.0217351	0.0658906
						0.0212501	0.0652741	0.0218452	0.0666487	0.0213836	0.0662877			0.0216605	0.0647614	0.0214187	0.0674146	0.0214734	0.0663949					0.0216832	0.0661286			0.021764	0.0661263	0.0214646	0.0650425			0.0218292	0.0658166	0.021269	0.0661345			0.0211884	0.0660473	0.0211589	0.0646232	0.0219355	0.0670125	0.0213241	0.0654132	0.0218106	0.0660828
						0.0213146	0.0654527	0.0219077	0.0668334	0.0214468	0.0664607			0.0217291	0.0649268	0.0214823	0.0675869	0.0215368	0.0665766					0.0217534	0.0663387			0.0218323	0.0663212	0.0215278	0.0652403			0.0218942	0.0659959	0.0213326	0.0663154			0.0212568	0.0662167	0.0212302	0.0648166	0.0220047	0.0672045	0.0213913	0.0655986	0.0218835	0.0662964
						0.021376	0.0656478	0.021967	0.0670351	0.0215069	0.0666497			0.0217946	0.0651078	0.0215429	0.0677752	0.0215972	0.0667751					0.0218208	0.0665681			0.0218975	0.066534	0.0215881	0.0654561			0.021956	0.0661917	0.0213932	0.0665131			0.021322	0.0664019	0.0212982	0.065028	0.0220709	0.0674142	0.0214551	0.0658011	0.0219533	0.0665298
						0.0214339	0.0658578	0.0220226	0.067252	0.0215636	0.0668531			0.0218564	0.0653028	0.0216002	0.0679778	0.0216542	0.0669886					0.0218847	0.0668149			0.0219589	0.0667631	0.0216448	0.0656882			0.0220141	0.0664025	0.0214502	0.0667257			0.0213835	0.0666014	0.0213623	0.0652554	0.0221337	0.06764	0.0215148	0.066019	0.0220192	0.0667809
						0.0214878	0.0660809	0.0220741	0.0674823	0.0216162	0.0670692			0.0219139	0.0655101	0.0216535	0.0681932	0.0217072	0.0672155					0.0219446	0.0670771			0.0220162	0.0670064	0.0216975	0.0659346			0.0220681	0.0666263	0.0215032	0.0669516			0.0214408	0.0668135	0.021422	0.0654971	0.0221923	0.06788	0.0215701	0.0662504	0.0220809	0.0670475
						0.0215371	0.0663152	0.0221211	0.0677241	0.0216645	0.0672962			0.0219667	0.0657281	0.0217025	0.0684193	0.0217559	0.0674536					0.022	0.0673523			0.0220686	0.0672618	0.0217457	0.0661932			0.0221174	0.0668614	0.0215516	0.0671887			0.0214932	0.0670364	0.0214767	0.065751	0.0222464	0.0681319	0.0216204	0.0664935	0.0221377	0.0673275
						0.0215816	0.0665586	0.022163	0.0679753	0.0217079	0.0675321			0.0220143	0.0659548	0.0217467	0.0686544	0.0217997	0.067701					0.0220503	0.0676383			0.0221159	0.0675273	0.0217891	0.0664618			0.0221617	0.0671057	0.0215952	0.0674352			0.0215405	0.0672682	0.0215261	0.0660148	0.0222955	0.0683938	0.0216653	0.066746	0.0221892	0.0676185
						0.0216207	0.0668092	0.0221997	0.0682336	0.0217461	0.0677748			0.0220563	0.0661882	0.0217857	0.0688964	0.0218384	0.0679557					0.0220952	0.0679325			0.0221577	0.0678004	0.0218272	0.0667381			0.0222004	0.0673572	0.0216335	0.0676887			0.0215822	0.067507	0.0215696	0.0662864	0.0223391	0.0686633	0.0217044	0.0670058	0.0222348	0.0679178
						0.0216542	0.0670647	0.0222307	0.068497	0.0217787	0.0680224			0.0220924	0.0664265	0.0218193	0.0691431	0.0218716	0.0682153					0.0221344	0.0682326			0.0221935	0.0680789	0.0218598	0.0670197			0.0222335	0.0676135	0.0216662	0.0679473			0.021618	0.0677505	0.0216069	0.0665633	0.0223769	0.0689382	0.0217374	0.0672708	0.0222744	0.0682231
						0.0216818	0.067323	0.0222559	0.0687632	0.0218056	0.0682727			0.0221221	0.0666676	0.021847	0.0693927	0.021899	0.0684778					0.0221673	0.0685358			0.022223	0.0683605	0.0218865	0.0673042			0.0222604	0.0678727	0.021693	0.0682086			0.0216474	0.0679969	0.0216377	0.0668434	0.0224085	0.0692162	0.0217641	0.0675386	0.0223074	0.0685316
[truncated: 28 more columns]

## Sheet: PlotDat3
Source sheet	Sheet1	0.3	424.931	1	419.288	12.4294
Plot name	Average2	36.7	424.931	2	430.731	12.2157
Plot Type	15			3	421.986	12.1937
1st free col	8			4	428.033	11.9268
Sigma Level	1			5	427.152	13.1976
Absolute Errs	TRUE			6	422.868	12.2032
Symbol Type	1			7	423.885	12.1874
Inverse Plot	FALSE			8	426.134	11.966
Color Plot	TRUE			9	421.766	11.9355
3D plot	FALSE			10	428.253	13.251
Linear	FALSE			11	420.815	12.1507
Data Range	P145:Q180			12	429.204	13.14
Filled Symbols	FALSE			13	423.53	12.2312
ConcAge	FALSE			14	426.49	11.471
ConcSwap	FALSE			15	430.42	12.6255
1st Symbol-row	1			16	419.598	12.3125
				17	432.246	12.0397
				18	417.771	13.1732
				19	416.949	13.7264
				20	433.067	13.1286
				21	419.828	13.1986
				22	430.191	13.8694
				23	416.684	11.234
				24	433.332	12.8024
				25	422.527	13.0629
				26	427.492	13.0151
				27	421.857	12.1548
				28	428.162	14.1047
				29	422.997	12.3686
				30	427.023	11.5963
				31	430.137	11.5875
				32	419.882	12.3061
				33	424.053	13.5515
				34	425.967	11.3157
				35	419.689	12.1122
				36	430.33	13.491
				IsoLine	IsoLine	IsoLine	IsoLine

## Sheet: PlotDat4
Source sheet	Sheet1	0.0138144	0.0437796	0.0124	0.0416851	0.0142648	0.0437444	0.0140967	0.0450429	0.0139386	0.0436332	0.013622	0.0432583	0.0139532	0.0431762	0.013927	0.0430059	0.0138778	0.0433052	0.0137528	0.0435521	0.0137401	0.0427718	0.0139063	0.0428437	0.0137432	0.0429581	0.0136179	0.0435901
Plot name	Concordia3	0.0136782	0.0450737	0.0146	0.0452941	0.0142759	0.0439108	0.0141124	0.0453122	0.013952	0.0438825	0.0136364	0.0435069	0.0139665	0.043424	0.0139425	0.0432659	0.0138987	0.0435853	0.013767	0.0438028	0.0137569	0.0430344	0.0139211	0.0430752	0.0137575	0.0432024	0.0136354	0.0438488
Plot Type	1	0.0135363	0.0436612			0.014283	0.044076	0.0141196	0.0455768	0.0139573	0.0441275	0.0136432	0.0437511	0.0139717	0.0436674	0.0139497	0.0435215	0.013911	0.0438606	0.013773	0.0440491	0.0137653	0.0432925	0.0139274	0.0433028	0.0137637	0.0434426	0.0136444	0.0441031
1st free col	31	0.0132493	0.0432853			0.0142861	0.0442387	0.0141183	0.0458316	0.0139544	0.0443634	0.0136424	0.0439863	0.0139688	0.0439019	0.0139485	0.0437677	0.0139144	0.0441259	0.0137707	0.0442864	0.0137649	0.0435411	0.0139252	0.0435222	0.0137615	0.0436739	0.0136449	0.0443481
Sigma Level	1	0.0135552	0.0432037			0.0142852	0.0443974	0.0141084	0.0460716	0.0139434	0.0445856	0.0136339	0.0442079	0.0139579	0.0441227	0.0139391	0.0439996	0.0139088	0.0443759	0.01376	0.0445099	0.013756	0.0437754	0.0139144	0.043729	0.0137511	0.0438919	0.0136367	0.044579
Absolute Errs	TRUE	0.0135206	0.0430362			0.0142803	0.0445509	0.0140902	0.0462922	0.0139244	0.0447898	0.0136179	0.0444115	0.0139391	0.0443257	0.0139215	0.0442127	0.0138944	0.0446059	0.0137411	0.0447154	0.0137386	0.0439908	0.0138954	0.0439192	0.0137326	0.0440923	0.01362	0.0447914
Symbol Type	1	0.0134547	0.0433431			0.0142714	0.0446978	0.0140639	0.0464891	0.0138979	0.0449721	0.0135947	0.0445931	0.0139128	0.0445068	0.013896	0.044403	0.0138714	0.0448112	0.0137146	0.0448989	0.0137131	0.0441832	0.0138684	0.0440892	0.0137065	0.0442712	0.0135952	0.044981
Inverse Plot	FALSE	0.0133428	0.043582			0.0142586	0.0448369	0.0140301	0.0466585	0.0138644	0.0451288	0.0135649	0.0447494	0.0138796	0.0446625	0.0138633	0.0445666	0.0138404	0.044988	0.0136808	0.0450567	0.01368	0.0443487	0.013834	0.0442356	0.0136731	0.0444251	0.0135627	0.0451443
Color Plot	TRUE	0.0133215	0.0428051			0.014242	0.044967	0.0139894	0.046797	0.0138244	0.045257	0.0135288	0.0448771	0.0138401	0.0447899	0.0138239	0.0447005	0.0138018	0.0451327	0.0136404	0.0451858	0.0136398	0.0444842	0.0137928	0.0443556	0.0136332	0.0445511	0.0135233	0.0452779
3D plot	FALSE	0.0134874	0.0428778			0.0142218	0.0450869	0.0139427	0.046902	0.0137789	0.0453542	0.0134874	0.0449738	0.0137951	0.0448864	0.0137787	0.0448019	0.0137564	0.0452427	0.0135942	0.0452836	0.0135935	0.044587	0.0137457	0.0444468	0.0135875	0.0446467	0.0134775	0.0453794
Linear	FALSE	0.0133369	0.0429886			0.0141981	0.0451957	0.0138909	0.0469714	0.0137287	0.0454183	0.0134413	0.0450377	0.0137453	0.0449501	0.0137283	0.044869	0.0137052	0.0453156	0.0135431	0.0453484	0.0135419	0.0446551	0.0136936	0.0445075	0.0135369	0.04471	0.0134264	0.0454468
Data Range	G182:K193	0.0132017	0.0436248			0.0141711	0.0452923	0.0138349	0.0470038	0.0136747	0.0454483	0.0133915	0.0450675	0.0136919	0.0449799	0.013674	0.0449005	0.0136491	0.0453502	0.0134881	0.0453788	0.013486	0.0446872	0.0136374	0.0445365	0.0134825	0.0447398	0.0133709	0.0454787
Filled Symbols	FALSE	IsoLine	IsoLine			0.0141411	0.0453761	0.0137759	0.0469987	0.013618	0.0454435	0.0133389	0.0450625	0.0136358	0.0449751	0.0136166	0.0448956	0.0135893	0.0453457	0.0134303	0.0453742	0.0134269	0.0446826	0.0135784	0.0445332	0.0134252	0.0447355	0.0133121	0.0454745
ConcAge	FALSE					0.0141082	0.0454463	0.0137149	0.0469561	0.0135597	0.045404	0.0132845	0.045023	0.0135781	0.0449358	0.0135574	0.0448545	0.0135268	0.0453022	0.0133708	0.0453347	0.0133658	0.0446416	0.0135175	0.0444976	0.0133662	0.0446972	0.0132512	0.0454343
ConcSwap	FALSE					0.0140729	0.0455022	0.0136533	0.0468769	0.013501	0.0453306	0.0132295	0.0449497	0.01352	0.0448627	0.0134975	0.0447781	0.0134629	0.0452206	0.0133108	0.0452611	0.0133038	0.0445648	0.0134561	0.0444306	0.0133066	0.0446257	0.0131893	0.0453588
1st Symbol-row	1					0.0140354	0.0455435	0.0135921	0.0467626	0.0134429	0.0452246	0.0131749	0.0448439	0.0134626	0.0447574	0.013438	0.0446678	0.0133989	0.0451024	0.0132514	0.0451549	0.0132421	0.0444537	0.0133953	0.0443333	0.0132476	0.0445222	0.0131277	0.0452497
						0.013996	0.0455697	0.0135326	0.0466154	0.0133867	0.0450883	0.0131217	0.0447079	0.013407	0.0446219	0.0133802	0.0445256	0.0133359	0.04495	0.0131937	0.045018	0.013182	0.0443105	0.0133363	0.0442076	0.0131904	0.044389	0.0130674	0.0451089
						0.013955	0.0455806	0.013476	0.0464382	0.0133334	0.0449242	0.013071	0.0445441	0.0133543	0.0444587	0.013325	0.0443546	0.0132752	0.0447663	0.013139	0.0448531	0.0131246	0.0441381	0.0132802	0.0440561	0.013136	0.0442285	0.0130099	0.0449392
						0.0139129	0.0455762	0.0134233	0.0462344	0.013284	0.0447355	0.0130237	0.0443558	0.0133055	0.0442712	0.0132737	0.0441578	0.0132181	0.0445549	0.0130882	0.0446636	0.013071	0.0439397	0.0132282	0.0438817	0.0130855	0.0440438	0.012956	0.0447439
						0.0138699	0.0455564	0.0133755	0.0460081	0.0132396	0.0445258	0.0129809	0.0441467	0.0132615	0.0440628	0.0132272	0.0439392	0.0131655	0.04432	0.0130423	0.0444529	0.0130223	0.0437192	0.0131812	0.0436877	0.0130399	0.0438386	0.0129069	0.0445269
						0.0138264	0.0455215	0.0133336	0.0457636	0.0132009	0.0442994	0.0129433	0.0439209	0.0132233	0.0438377	0.0131864	0.043703	0.0131186	0.044066	0.0130024	0.0442253	0.0129795	0.0434809	0.0131401	0.043478	0.0130001	0.0436169	0.0128636	0.0442923
						0.0137828	0.0454717	0.0132985	0.0455056	0.0131687	0.0440605	0.0129116	0.0436826	0.0131915	0.0436003	0.0131521	0.0434539	0.0130782	0.0437979	0.012969	0.0439852	0.0129432	0.0432295	0.0131059	0.0432566	0.0129669	0.0433829	0.0128268	0.0440447
						0.0137395	0.0454075	0.0132707	0.0452392	0.0131438	0.0438139	0.0128865	0.0434366	0.0131668	0.0433552	0.013125	0.0431966	0.0130452	0.043521	0.0129429	0.0437373	0.0129144	0.0429698	0.013079	0.0430278	0.0129408	0.0431412	0.0127974	0.0437889
						0.0136968	0.0453294	0.0132509	0.0449696	0.0131264	0.0435643	0.0128685	0.0431877	0.0131496	0.0431071	0.0131055	0.0429362	0.0130201	0.0432406	0.0129246	0.0434863	0.0128935	0.0427069	0.0130601	0.0427961	0.0129225	0.0428966	0.0127758	0.0435299
						0.0136552	0.045238	0.0132394	0.0447021	0.013117	0.0433166	0.0128579	0.0429407	0.0131404	0.0428609	0.0130942	0.0426778	0.0130035	0.0429623	0.0129145	0.0432372	0.0128809	0.0424459	0.0130495	0.042566	0.0129122	0.0426538	0.0127625	0.0432728
						0.0136149	0.0451343	0.0132364	0.0444418	0.0131158	0.0430755	0.0128549	0.0427004	0.0131392	0.0426214	0.0130912	0.0424263	0.0129957	0.0426913	0.0129127	0.0429948	0.0128769	0.0421919	0.0130475	0.0423419	0.0129102	0.0424175	0.0127577	0.0430226
						0.0135763	0.0450189	0.013242	0.0441937	0.0131228	0.0428459	0.0128596	0.0424714	0.0131461	0.0423932	0.0130965	0.0421867	0.0129967	0.042433	0.0129192	0.0427638	0.0128815	0.0419499	0.013054	0.0421283	0.0129165	0.0421923	0.0127616	0.042784
						0.0135397	0.044893	0.0132561	0.0439628	0.0131378	0.0426322	0.0128719	0.0422584	0.013161	0.0421808	0.01311	0.0419636	0.0130068	0.0421924	0.012934	0.0425488	0.0128947	0.0417245	0.0130689	0.0419293	0.012931	0.0419826	0.0127741	0.0425619
						0.0135055	0.0447576	0.0132785	0.0437536	0.0131606	0.0424384	0.0128915	0.0420652	0.0131836	0.0419883	0.0131316	0.0417614	0.0130255	0.0419743	0.0129568	0.0423538	0.0129162	0.0415201	0.013092	0.0417487	0.0129534	0.0417925	0.0127949	0.0423604
						0.0134739	0.0446139	0.0133086	0.04357	0.0131907	0.0422685	0.0129181	0.0418959	0.0132134	0.0418194	0.0131607	0.0415841	0.0130526	0.0417827	0.012987	0.0421828	0.0129456	0.0413407	0.0131228	0.0415901	0.0129832	0.0416256	0.0128236	0.0421835
						0.0134452	0.044463	0.0133459	0.0434157	0.0132275	0.0421257	0.0129511	0.0417536	0.0132498	0.0416775	0.0131969	0.0414349	0.0130875	0.0416216	0.0130242	0.042039	0.0129823	0.0411899	0.0131606	0.0414566	0.01302	0.0414853	0.0128596	0.0420347
						0.0134197	0.0443063	0.0133897	0.0432936	0.0132703	0.0420128	0.0129899	0.0416411	0.0132922	0.0415653	0.0132393	0.041317	0.0131295	0.0414939	0.0130676	0.0419252	0.0130256	0.0410704	0.0132049	0.0413507	0.0130629	0.0413743	0.0129023	0.0419168
						0.0133975	0.0441451	0.013439	0.0432062	0.0133184	0.0419319	0.0130338	0.0415606	0.0133397	0.041485	0.0132872	0.0412325	0.0131779	0.0414023	0.0131164	0.0418437	0.0130747	0.0409848	0.0132546	0.0412746	0.0131111	0.0412947	0.0129509	0.0418322
						0.0133789	0.0439808	0.0134931	0.0431552	0.0133706	0.0418847	0.0130819	0.0415136	0.0133915	0.0414381	0.0133397	0.0411831	0.0132317	0.0413484	0.0131695	0.041796	0.0131286	0.0409346	0.0133089	0.0412297	0.0131638	0.041248	0.0130043	0.0417824
						0.013364	0.0438148	0.0135507	0.0431415	0.0134261	0.0418721	0.0131332	0.0415012	0.0134463	0.0414257	0.0133957	0.0411698	0.0132898	0.0413333	0.013226	0.0417831	0.0131862	0.0409207	0.0133666	0.0412168	0.0132198	0.0412352	0.0130616	0.0417686
						0.0133529	0.0436485	0.0136109	0.0431654	0.0134837	0.0418943	0.0131868	0.0415235	0.0135034	0.0414478	0.0134541	0.0411928	0.0133512	0.0413574	0.0132848	0.0418052	0.0132465	0.0409436	0.0134267	0.0412363	0.013278	0.0412566	0.0131216	0.0417908
						0.0133458	0.0434832	0.0136723	0.0432265	0.0135424	0.0419509	0.0132416	0.04158	0.0135614	0.0415041	0.0135138	0.0412517	0.0134145	0.0414201	0.0133448	0.0418619	0.0133082	0.0410027	0.013488	0.0412877	0.0133375	0.0413116	0.0131832	0.0418488
						0.0133427	0.0433206	0.0137339	0.0433235	0.0136009	0.0420408	0.0132966	0.0416698	0.0136193	0.0415934	0.0135736	0.0413453	0.0134786	0.0415202	0.0134046	0.041952	0.0133702	0.0410969	0.0135493	0.0413701	0.0133969	0.0413993	0.0132451	0.0419413
						0.0133436	0.0431618	0.0137943	0.0434545	0.0136582	0.0421623	0.0133506	0.041791	0.0136759	0.0417142	0.0136325	0.0414719	0.0135423	0.0416558	0.0134633	0.0420739	0.0134313	0.0412243	0.0136093	0.0414818	0.0134552	0.0415179	0.0133062	0.0420666
						0.0133485	0.0430083	0.0138526	0.0436171	0.0137131	0.0423129	0.0134027	0.0419413	0.0137302	0.0418639	0.0136891	0.0416289	0.0136042	0.0418243	0.0135197	0.0422251	0.0134902	0.0413825	0.013667	0.0416207	0.0135111	0.0416652	0.0133652	0.0422222
						0.0133574	0.0428614	0.0139074	0.0438081	0.0137645	0.0424897	0.0134518	0.0421177	0.0137812	0.0420397	0.0137425	0.0418132	0.0136633	0.0420223	0.0135725	0.0424028	0.0135458	0.0415683	0.0137212	0.0417841	0.0135637	0.0418382	0.0134211	0.0424051
						0.0133702	0.0427223	0.0139577	0.0440236	0.0138115	0.0426894	0.0134969	0.0423169	0.0138277	0.0422381	0.0137915	0.0420214	0.0137183	0.042246	0.013621	0.0426034	0.013597	0.0417783	0.0137708	0.0419688	0.0136118	0.0420336	0.0134727	0.0426118
						0.0133868	0.0425923	0.0140027	0.0442597	0.0138532	0.0429079	0.0135373	0.0425349	0.0138689	0.0424553	0.0138353	0.0422493	0.0137681	0.0424911	0.013664	0.042823	0.0136429	0.0420082	0.013815	0.0421711	0.0136546	0.0422476	0.013519	0.0428381
						0.0134071	0.0424723	0.0140413	0.0445115	0.0138887	0.0431412	0.013572	0.0427675	0.013904	0.0426872	0.0138729	0.0424926	0.0138119	0.0427528	0.0137007	0.0430574	0.0136826	0.0422537	0.0138527	0.0423872	0.0136912	0.042476	0.0135591	0.0430798
						0.0134308	0.0423636	0.0140728	0.0447743	0.0139173	0.0433845	0.0136004	0.0430102	0.0139323	0.042929	0.0139037	0.0427464	0.0138487	0.0430259	0.0137305	0.043302	0.0137152	0.0425099	0.0138834	0.0426129	0.013721	0.0427144	0.0135923	0.0433321
						0.0134578	0.0422669	0.0140967	0.0450429	0.0139386	0.0436332	0.013622	0.0432583	0.0139532	0.0431762	0.013927	0.0430059	0.0138778	0.0433052	0.0137528	0.0435521	0.0137401	0.0427718	0.0139063	0.0428437	0.0137432	0.0429581	0.0136179	0.0435901
						0.0134878	0.0421831
						0.0135206	0.0421129
						0.0135559	0.042057
						0.0135935	0.0420157
						0.0136329	0.0419895
						0.0136738	0.0419786
						0.013716	0.041983
						0.013759	0.0420028
						0.0138025	0.0420377
						0.013846	0.0420875
						0.0138893	0.0421517
						0.013932	0.0422299
						0.0139737	0.0423212
						0.014014	0.042425
						0.0140526	0.0425403
						0.0140891	0.0426662
						0.0141234	0.0428016
						0.014155	0.0429454
						0.0141836	0.0430962
						0.0142092	0.0432529
						0.0142313	0.0434141
						0.01425	0.0435784
						0.0142648	0.0437444

## Sheet: PlotDat5
Source sheet	Sheet1	0.3	270.074	1	277.309	7.68654
Plot name	Average4	12.7	270.074	2	274.594	7.20009
Plot Type	15			3	271.764	6.86029
1st free col	8			4	266.04	6.42935
Sigma Level	1			5	272.141	6.78693
Absolute Errs	TRUE			6	271.451	6.99976
Symbol Type	1			7	270.137	7.49128
Inverse Plot	FALSE			8	267.904	7.01517
Color Plot	TRUE			9	267.48	7.24721
3D plot	FALSE			10	270.789	7.1738
Linear	FALSE			11	267.787	6.95899
Data Range	P182:Q193			12	265.09	7.2373
Filled Symbols	FALSE			IsoLine	IsoLine	IsoLine	IsoLine
ConcAge	FALSE
ConcSwap	FALSE
1st Symbol-row	1

## Sheet: Sheet1
Table S5. Monazite U–Th–Pb dating and trace element data of the paragneisses and leucosome
Sample	Domain	207Pb/206Pb		207Pb/235U		208Pb/232Th		206Pb/238U		rho	207Pb/206Pb		207Pb/235U		208Pb/232Th		206Pb/238U		Con (%)	Y	Nb	La	Ce	Pr	Nd	Sm	Eu	Gd	Tb	Dy	Ho	Er	Tm	Yb	Lu	HREE	Eu/Eu*	Hf	Ta	Th	U
		Ratio	1σ	Ratio	1σ	Ratio	1σ	Ratio	1σ		Age (Ma)	1σ	Age (Ma)	1σ	Age (Ma)	1σ	Age (Ma)	1σ		ppm	ppm	ppm	ppm	ppm	ppm	ppm	ppm	ppm	ppm	ppm	ppm	ppm	ppm	ppm	ppm	ppm		ppm	ppm	ppm	ppm
91-5 paragneiss
91-5_29	rim	0.0403537	0.00319352	0.0360346	0.0026867	0.00203666	3.74906e-05	0.00648181	0.000139171	0.287973			35.9451	2.63326	41.1236	0.756228	41.6496	0.891658	85	15044.7	0.0292785	95964.9	187751	20184.1	75983.6	14286.9	443.15	9356.92	1124.09	4768.45	646.332	1140.21	115.255	493.478	45.3638	2440.64	0.117176	0.476367	0.0229489	29471.1	4042.33
91-5_30	rim	0.0517572	0.00230896	0.0453936	0.00183507	0.00207663	1.65894e-05	0.00637826	6.53856e-05	0.253584	275.99	101.838	45.0764	1.78265	41.9299	0.334613	40.9863	0.419416	90	27303.7	0.0614535	140093	228219	26779.3	107515	21254	590.872	16114.5	2035.46	8543.9	1112.2	1819.65	161.307	627.179	55.3301	3775.67	0.0976087	0.375362	0.0950094	69309.5	5539.66
91-5_01	rim	0.049248	0.00279342	0.0437817	0.00229569	0.00210832	2.57696e-05	0.00653091	0.000101946	0.297698	166.75	133.315	43.5095	2.23342	42.5691	0.519765	41.9641	0.653316	96	16140	0	96998.6	187040	20337.5	76113.6	15123.4	441.732	10290	1259.47	5212.89	686.831	1152.8	110.377	475.653	43.6581	2469.31	0.108256	0.423475	0.0848353	38204.1	5108.61
91-5_24	rim	0.0496616	0.00272453	0.046321	0.00229556	0.00213718	2.47325e-05	0.00690843	0.000118552	0.346273	188.97	123.13	45.9767	2.2279	43.1511	0.498834	44.3815	0.759371	96	15378.3	0	92780.1	176651	19014.8	72188.2	12996.3	331.656	8255.04	1021.73	4535.82	652.985	1246.5	132.959	598.186	58.0107	2688.64	0.0978908	0.446266	0.0685406	48933.5	4287.19
91-5_25	rim	0.0543863	0.00312539	0.0509589	0.00273826	0.00215797	2.96828e-05	0.00693827	0.000123384	0.330943	387.09	134.245	50.4676	2.64579	43.5703	0.598664	44.5725	0.790269	87	15366.4	0	99936.4	185042	19789.3	73022.4	13051.6	342.473	8382.06	1042.73	4645.55	658.183	1216.26	123.537	578.155	54.7289	2630.86	0.100102	0.251486	0.022887	40668.7	4655.02
91-5_13	rim	0.0454219	0.00299831	0.0406841	0.00250543	0.00216367	2.57583e-05	0.00661652	0.000114824	0.281801			40.4917	2.44468	43.6853	0.519509	42.5124	0.735694	95	16202.3	0	96441.1	183707	20327.2	76617.4	14168.7	360.878	10003.3	1233.8	5137.98	675.702	1105.79	94.0718	369.853	31.0368	2276.45	0.092672	0.337846	0.10766	50187.3	3800.25
91-5_23	rim	0.0485274	0.00327957	0.047326	0.00314538	0.00217827	2.675e-05	0.00710156	0.000123691	0.262067	124.16	151.83	46.9516	3.04961	43.9799	0.539501	45.6178	0.792127	97	15682.3	0.028388	91874.7	177634	18960.2	71792.8	12954	339.836	8253.97	1006.44	4646.91	658.672	1242.13	131.073	599.314	55.4175	2686.61	0.100475	0.300071	0.0297945	46826	4152.64
91-5_40	rim	0.0483867	0.00153299	0.0487395	0.00152185	0.00228661	1.80039e-05	0.00732941	7.13954e-05	0.311968	116.755	74.065	48.3211	1.47381	46.1648	0.363069	47.0761	0.457602	97	26766	0.119616	140060	230087	26696.3	106703	20364.1	522.793	13342.9	1715.39	7821.65	1158.17	2210.54	231.6	1049.72	99.7912	4749.82	0.0969605	0.4533	0.0714612	64826.9	6682.98
91-5_41	rim	0.046425	0.00131671	0.0450322	0.00119899	0.00230994	2.02113e-05	0.00708257	7.2324e-05	0.38353	20.47	66.66	44.7253	1.16537	46.6352	0.407573	45.4963	0.463603	98	24340.4	0.0749386	152544	237998	26764.9	101789	19660.3	508.378	13480.3	1736.75	7530.85	1017.49	1835.59	181.6	797.317	75.8913	3907.89	0.0954697	0.454146	0.0511426	47207.7	9214.44
91-5_09	rim	0.0566631	0.00472389	0.0546069	0.00400083	0.00232125	2.86739e-05	0.00728994	0.000131599	0.246392	479.67	185.162	53.9859	3.85221	46.8633	0.578221	46.8235	0.842582	85	17781.4	0	97793.6	189823	20882.4	79185.3	15565.8	279.359	10950.6	1332.09	5665.13	742.734	1232.09	115.391	450.547	40.0056	2580.76	0.0654155	0.457082	0.132673	33289.4	2759.21
91-5_22	rim	0.0490096	0.00404774	0.0491698	0.0035145	0.00233263	2.70587e-05	0.00745434	0.00016485	0.309396	150.085	181.455	48.7376	3.40148	47.0927	0.545645	47.8756	1.05515	98	16637.5	0	98070.1	186060	19994.7	76054.8	14370.7	236.745	10084	1229.67	5205.57	695.19	1155.59	110.346	439.313	38.4273	2438.86	0.0601241	0.194766	0.0531826	33761.8	2576.8
91-5_04	rim	0.0539231	0.00445183	0.0555107	0.00389469	0.00236809	2.45037e-05	0.00776248	0.000156324	0.28703	368.57	187.015	54.8558	3.74681	47.8079	0.494105	49.8469	1.00033	90	16143.2	0	92084.1	174479	18934.6	72871	13961.8	222.485	10030.6	1227.35	4999.02	641.18	996.237	86.1298	321.809	25.7612	2071.12	0.0574765	0.561602	0.0488255	46612.7	2028.38
91-5_03	rim	0.0519029	0.00390372	0.0511094	0.00309062	0.00238593	3.24233e-05	0.00748168	0.000129971	0.287278	279.69	178.68	50.613	2.98577	48.1676	0.653788	48.0505	0.83203	94	22915.8	0	101841	193862	21322.4	79278.4	16718	324.2	12865.4	1693.27	7203.63	911.782	1387.56	122.081	448.324	37.9863	2907.73	0.0675822	0.600581	0.131286	24578.1	3766.43
91-5_12	rim	0.0483673	0.00252292	0.0503562	0.00274002	0.00240352	2.85658e-05	0.00751269	0.000110209	0.269601	116.755	118.495	49.8851	2.64901	48.5222	0.575994	48.2489	0.705639	96	14966.1	0.0580727	89069.4	178851	20358.1	79734.3	19738	307.264	16250.5	1666.99	5161.06	507.484	696.966	51.5125	163.95	11.7791	1431.69	0.0524506	0.309257	0.0153596	40407.2	6654.68
91-5_36	rim	0.0461046	0.00158721	0.0460906	0.00159352	0.00241969	1.89624e-05	0.00725959	6.59615e-05	0.262806			45.7532	1.54705	48.8482	0.382348	46.6293	0.422901	98	26163.9	0.0895462	151566	235809	26252.8	104189	20479.3	518.764	16059.3	1983.14	8310.07	1013.69	1582.22	124.996	454.734	36.2201	3211.87	0.0874527	0.786741	0.0306532	50695	6497.71
91-5_28	rim	0.0515144	0.00380285	0.0529706	0.0033154	0.00243064	3.27201e-05	0.00780886	0.000143592	0.293793	264.88	174.977	52.4093	3.19725	49.069	0.659742	50.1436	0.91888	95	21310.7	0	93047.7	185015	20150.4	78531.7	15480.7	295.402	11763.1	1496.3	6727.32	848.399	1379.45	114.649	409.561	33.8042	2785.87	0.0669238	0.546084	0.0470778	28899.3	3117.46
91-5_02	rim	0.0541621	0.00387954	0.0585627	0.00401072	0.00243236	2.96549e-05	0.0079488	0.000126642	0.232635	375.98	161.095	57.7875	3.84732	49.1037	0.597936	51.0387	0.810419	87	20252.7	0	99113.3	186451	20507.9	76030.3	15026.1	282.842	11364.3	1481.94	6180.46	800.994	1181.63	91.8442	323.518	25.0917	2423.08	0.0661718	0.615128	0.072037	29199.7	2764.91
91-5_21	rim	0.0555005	0.00429421	0.0577109	0.00404095	0.0024565	2.81559e-05	0.0077481	0.000139849	0.257773	431.53	172.202	56.9701	3.87943	49.5905	0.5677	49.7549	0.894994	86	20476.2	0	96312.2	192681	20970.7	78507	15376	297.001	11710	1508.99	6407.95	830.823	1287.04	105.39	381.366	30.7399	2635.36	0.0676677	0.360298	0.0819876	30693.5	3107.98
91-5_32	rim	0.0496299	0.00240237	0.0575713	0.00272074	0.00249002	1.78323e-05	0.0084459	0.000104401	0.261564	176.01	112.948	56.8361	2.61249	50.2663	0.359535	54.2171	0.668018	95	29422.2	0.0802612	135580	216517	25524.2	103614	19692.4	242.987	15706.5	1974.28	8711.32	1197.98	2009.98	175.633	686.042	61.0336	4130.67	0.0422394	0.783563	0.121219	92148.2	2448.34
91-5_15	rim	0.0493803	0.00434523	0.0546377	0.00430873	0.00249179	2.70715e-05	0.00819975	0.00016753	0.259081	164.9	201.82	54.0157	4.14852	50.302	0.545815	52.6434	1.07156	97	20617.4	0.0598899	97826.5	187584	20171	76651.6	14546.7	240.729	11239	1419.55	6231.48	833.831	1243.78	101.829	377.848	29.5771	2586.86	0.0575582	0.260288	0.102688	37866.6	2229.93
91-5_05	rim	0.0467218	0.00306542	0.0502748	0.00301684	0.00249884	2.87306e-05	0.00790201	0.000124442	0.262438	35.28	148.135	49.8064	2.91681	50.4442	0.579262	50.7394	0.796386	98	23434.4	0	93028.1	178397	19231.5	72473.1	14161.1	254.943	11481.2	1509.97	6553.35	903.246	1394.34	112.726	423.562	34.1441	2868.01	0.0611257	0.627233	0.121394	38756.4	2803.74
91-5_20	rim	0.0469083	0.00345628	0.0508383	0.003316	0.00249998	3.10487e-05	0.00789779	0.000130254	0.252849	55.65	157.385	50.351	3.2043	50.4671	0.625999	50.7124	0.833541	99	19963.5	0	101610	194057	21040.8	78088.1	15037.4	289.38	11234	1435.56	6213.6	772.31	1202.05	99.7947	377.723	29.0912	2480.97	0.0680675	0.590849	0.0806727	25389	2875.78
91-5_08	rim	0.045837	0.00318352	0.0514094	0.00335355	0.00250026	2.72619e-05	0.00818318	0.000145592	0.272742			50.9027	3.23882	50.4727	0.549649	52.5375	0.931358	96	22730.6	0	94461.1	183672	19792.6	74994	14889.3	270.737	11617	1497.92	6626.48	877.599	1335.77	105.743	396.635	29.3912	2745.13	0.0629342	0.386521	0.0980529	34950	2967.64
91-5_06	rim	0.0521402	0.00431559	0.0590082	0.00393123	0.00253175	2.80739e-05	0.0084009	0.000159207	0.284459	300.06	188.865	58.2148	3.76949	51.1077	0.566003	53.9295	1.01818	92	19280.5	0	92777.8	181528	19732.9	76559.4	14638.5	225.2	12243.7	1474.27	5966.66	723.742	934.136	58.1285	173.619	11.9701	1901.6	0.0514266	0.421196	0.0935038	40544.6	2103.39
91-5_14	rim	0.054923	0.00418403	0.0598845	0.00408375	0.00260599	3.00555e-05	0.00819288	0.000140159	0.250865	409.31	172.205	59.0546	3.91249	52.6044	0.605909	52.5995	0.896629	88	21572.1	0	95238.2	189421	20868.4	79042.1	15678.9	272.514	12977.4	1605.46	6691.37	843.581	1223.29	89.0897	312.385	23.278	2491.63	0.0584064	0.3741	0.0864594	33476.1	2950.48
91-5_11	rim	0.0446816	0.00161522	0.0516108	0.00194469	0.00263325	3.19423e-05	0.00834501	8.80619e-05	0.28006			51.0972	1.87802	53.1538	0.64393	53.5721	0.563728	95	18079.3	0	92265.9	185913	20802.2	80860.7	17005.5	607.609	12510.1	1592.44	6403.91	738.154	1061.5	87.6108	321.143	23.1785	2231.58	0.127357	0.511265	0.0543135	25954.3	11532
91-5_38	rim	0.0487625	0.00202112	0.0555395	0.00226764	0.00267246	2.26184e-05	0.00828496	8.80781e-05	0.260378	200.075	98.135	54.8835	2.18169	53.9443	0.45595	53.1883	0.563855	96	30943.9	0.135959	141725	236037	27309.1	108614	21643.6	377.282	17043.3	2183.48	9517.05	1207.97	1834.47	153.191	542.636	41.7896	3780.06	0.0600548	0.979094	0.103331	43748.2	3300.54
91-5_34	rim	0.0474016	0.0024243	0.0555259	0.00259868	0.00271574	2.24492e-05	0.00854822	0.000110063	0.275112	77.87	109.25	54.8705	2.50012	54.8168	0.452519	54.8712	0.704122	99	25413.6	0.0936947	131853	217182	25357.8	103900	19519.7	237.412	16052	1942.15	7889.51	956.205	1267.99	83.2005	253.392	16.6702	2577.46	0.0410038	0.571095	0.0214211	101639	3035.21
91-5_45	rim	0.0495714	0.0019622	0.0568672	0.00224799	0.00271624	2.24248e-05	0.00835156	8.84418e-05	0.267891	176.01	92.58	56.1599	2.16009	54.8268	0.452028	53.6141	0.566151	95	36026.6	0.182714	133667	222446	26320	106092	21452.1	339.11	18992.4	2399.3	10660.4	1419.69	2050.53	146.722	453.036	32.4983	4102.48	0.0513616	0.889182	0.0725405	53716.3	3660.45
91-5_44	rim	0.048313	0.00206359	0.0564524	0.00226975	0.0027247	2.19962e-05	0.00858819	0.000102154	0.295842	122.31	101.838	55.7613	2.18184	54.9973	0.443385	55.1267	0.653601	98	40604.9	0.0913303	141880	222702	25805.8	101356	19935.7	257.678	18051.7	2350.87	10786.1	1575.56	2556.6	207.483	726.337	58.2919	5124.27	0.0415266	0.552614	0.0829924	49511.9	3322.13
91-5_46	rim	0.0492921	0.00196728	0.0581791	0.00218302	0.00281568	2.27943e-05	0.00864888	9.57823e-05	0.295144	161.195	94.43	57.4195	2.0951	56.8311	0.45943	55.5145	0.612891	96	44707.4	0.0758267	128580	213854	25312.8	104714	22062.2	332.976	20420.6	2740.67	12492.5	1762.96	2761.2	208.711	704.174	53.8838	5490.93	0.0479598	1.43458	0.175386	53726.4	4273.33
91-9 paragneiss
91-9_16	rim	0.0397953	0.00583063	0.037809	0.0048443	0.00212348	3.64771e-05	0.00714857	0.000207514	0.226565			37.6827	4.73969	42.8747	0.735722	45.9187	1.32846	80	20810.5	0.0831172	120164	220503	24245.8	92524.5	19115.7	354.47	14105.2	1657.52	6934.73	903.041	1489.42	120.296	466.464	40.3905	3019.61	0.0659962	0.636445	0.0283821	68917.1	5143.07
91-9_18	rim	0.0399443	0.0061863	0.0411402	0.00681735	0.00218007	4.25717e-05	0.00726964	0.000226378	0.18792			40.9366	6.64875	44.016	0.858597	46.6936	1.44902	86	20566.3	0	124899	229301	24940.6	93255	19284	384.695	14235.6	1691.12	7021.35	882.27	1431.83	112.78	421.992	37.2766	2886.14	0.070983	0.847827	0.182923	48745	5095.2
91-9_15	rim	0.0421182	0.00570114	0.0377256	0.00426857	0.00219706	4.34332e-05	0.00721404	0.000216735	0.265524			37.601	4.17674	44.3588	0.875957	46.3377	1.38738	79	20764.6	0	127799	230411	24703.9	91474	18365	391.422	13912.9	1666.96	6972.7	883.659	1454.09	111.713	445.697	38.4965	2933.65	0.0748626	0.671058	0.0842897	45272.2	5538.08
91-9_19	rim	0.0859575	0.0135106	0.0704823	0.00994016	0.00230113	5.3279e-05	0.00686581	0.000229929	0.237459	1338.88	307.868	69.157	9.42865	46.4575	1.07441	44.1086	1.47231	55	20372.3	0	117941	233354	26259.7	99790.1	21083.5	223.187	15848.5	1891.77	7360.42	881.232	1357.48	102.098	412.617	32.9165	2786.34	0.0373274	1.20125	0.0907476	43261.3	3571.79
91-9_09	rim	0.0677709	0.0187714	0.0495865	0.00961719	0.00231135	5.0622e-05	0.00800895	0.000327512	0.210847	861.105	601.808	49.1408	9.30385	46.6635	1.02082	51.4234	2.09469	95	25362.9	0	124244	226973	24948.2	93209.5	18946.7	261.193	13948.6	1782.37	7976.91	1081.54	1848.28	150.693	573.735	49.7077	3703.96	0.0491194	1.13074	0.0629245	54078.7	2404.5
91-9_05	rim	0.0640045	0.0170697	0.044046	0.0065855	0.00231495	4.10083e-05	0.00775207	0.000302357	0.260868	742.6	588.84	43.7666	6.40477	46.7362	0.826956	49.7803	1.93431	87	24157.9	0	114447	213969	23679.6	92021.9	19119.9	253.321	14805.5	1799.31	7873.92	1015.94	1564.78	114.059	408.363	30.3089	3133.45	0.04603	0.725793	0.109077	77771.8	3378.53
91-9_04	rim	0.0666762	0.0123246	0.0641722	0.00939041	0.00232899	5.15128e-05	0.00745988	0.000300935	0.275679	827.775	392.567	63.154	8.95999	47.0193	1.03877	47.911	1.92576	72	24738	0.124388	117560	216723	24439.4	94929.1	19459.5	221.203	15768.8	1997.04	8496.23	1010.2	1447.58	91.9993	296.425	22.8102	2869.01	0.0386056	0.771899	0.107092	73742	3244.84
91-9_14	rim	0.0666116	0.0102667	0.0593336	0.007299	0.00233683	4.47188e-05	0.00737717	0.000240716	0.265247	825.61	326.675	58.5267	6.99629	47.1774	0.90176	47.3818	1.5406	78	18490	0	124430	230448	25679.3	98699.4	19206.2	299.048	14158.3	1643.45	6469.16	785.543	1207.92	86.8979	343.357	27.2548	2450.97	0.055442	0.858472	0.0891476	51363.1	3858.59
91-9_10	rim	0.0582476	0.0122016	0.0533189	0.00835763	0.00233885	4.52859e-05	0.007815	0.000323302	0.263923	538.925	403.665	52.7451	8.0567	47.2181	0.913192	50.1829	2.06816	95	5960.39	0.0944495	126581	243035	27338.4	106377	20820.2	139.612	14047	1306.81	3452.28	254.737	224.063	10.0075	23.1264	2.13725	514.071	0.0249581	0	0	58430.3	3080.88
91-9_06	rim	0.0577077	0.011167	0.0504264	0.00774594	0.00239426	4.45874e-05	0.00807432	0.000331204	0.267039	520.41	430.507	49.953	7.4876	48.3355	0.899059	51.8414	2.11816	96	25773.6	0.0660886	120958	223558	24125.9	89870.7	18029.5	222.393	13234.9	1708.52	7857.71	1092.04	1978.75	158.578	619.663	56.3477	3905.38	0.0440143	0.681162	0.187411	71618.4	2690.58
91-9_08	rim	0.0503443	0.0088394	0.0479062	0.00799078	0.00242469	4.46647e-05	0.00758539	0.000264492	0.209043	209.33	362.925	47.5139	7.74284	48.949	0.900589	48.7141	1.69239	97	27991.3	0	113108	212450	23106.7	86842.2	18542.9	243.807	14078.3	1835.4	8480.63	1173.89	2099.77	174.549	678.574	59.3646	4186.15	0.0461324	0.712484	0.162841	77411.8	3120.91
91-9_07	rim	0.0501891	0.00996692	0.0491802	0.0097904	0.00242792	4.0279e-05	0.00826138	0.000274128	0.166683	211.185	398.095	48.7476	9.47508	49.0143	0.812157	53.0375	1.7529	91	26413	0	114972	213175	23453.9	87784.1	18311.1	241.677	13855.1	1764.94	8172.4	1136.32	1980.99	162.3	640.073	54.9688	3974.65	0.0463869	0.722195	0.185308	81122.7	2964.69
91-9_02	rim	0.0643598	0.00853838	0.065015	0.00788207	0.00244954	4.45595e-05	0.00755355	0.000234493	0.256066	753.71	278.68	63.9579	7.51487	49.4502	0.898446	48.5104	1.50053	72	24702.2	0	112261	216550	24210.8	94473.4	19547.5	253.982	15141.3	1885.27	8014.94	1025.14	1517.05	107.531	363.397	25.8674	3038.99	0.0451334	0.328882	0.122521	67981.3	3668.27
91-9_13	rim	0.0416351	0.00599871	0.0419294	0.00494281	0.0024817	4.38954e-05	0.00776442	0.000276437	0.302017			41.7061	4.81696	50.0985	0.885027	49.8593	1.7685	82	12459.5	0.055366	119117	231448	27305.5	107434	23419.6	174.44	18427.6	1947.15	5965.44	487.185	432.547	18.1201	46.7106	2.68881	987.251	0.0256712	0.679453	0.056851	49309.9	3883.14
91-9_20	rim	0.0360144	0.00543508	0.040515	0.00442447	0.00252571	5.30458e-05	0.00830233	0.000255182	0.281453			40.3267	4.31769	50.9859	1.06947	53.2993	1.63172	72	24293	0	115373	226033	25585.5	97952.8	20072.4	295.941	15609.4	1926.72	8091.08	944.793	1322.47	84.5565	238.167	16.8082	2606.8	0.0511135	0.859112	0	46730	4082.89
91-9_01	rim	0.050292	0.00491785	0.061734	0.00545491	0.0027992	5.49688e-05	0.0091996	0.000216942	0.266877	209.33	211.09	60.8249	5.21693	56.4989	1.10794	59.0333	1.38611	97	23997.1	0	119369	223733	24839.9	97033.8	19838.4	982.312	13869.1	1831.17	8187.35	1075.97	1821.77	147.916	578.69	50.8879	3675.23	0.181049	0.935676	0.131464	44688.4	8714.45
91-9_11	core	0.0586416	0.00751513	0.0805962	0.00959549	0.00341692	8.21557e-05	0.0103879	0.000308473	0.249422	553.74	278.67	78.7053	9.01657	68.9459	1.65489	66.6195	1.96843	83	11081.1	0	128521	230394	26882.8	105063	22793.7	1580.95	16143.7	1684.85	5574.74	498.543	514.538	21.7589	56.138	3.48241	1094.46	0.25196	0.22655	0.0197139	42340.9	5763
91-16 paragneiss
91-16_39	rim	0.0478424	0.00232031	0.0470754	0.00220073	0.00223678	2.15052e-05	0.00718333	8.77187e-05	0.261212	100.09	111.095	46.7086	2.13436	45.1598	0.433698	46.1412	0.561991	98	22267.7	0.0319713	137967	215845	23865.7	92074.6	18164.5	545.095	14038.9	1795.93	7481.92	971.234	1552.4	137.385	533.508	50.3944	3244.92	0.104356	0.396568	0.0662818	51721.9	6727.46
91-16_24	rim	0.0470021	0.00247692	0.0496236	0.00242724	0.00229265	1.88759e-05	0.00778117	9.59704e-05	0.252155	55.65	116.655	49.1766	2.3483	46.2865	0.380652	49.9665	0.614481	98	26531.8	0.0888585	122118	197886	22232.8	86988.5	18345.4	367.069	13867.4	1803.73	7938.87	1145.53	2059.91	197.955	847.927	79.6388	4330.95	0.0703573	0.431217	0.184898	96154.3	5263.84
91-16_23	rim	0.0493411	0.00255125	0.0522442	0.00259868	0.00230331	2.12279e-05	0.00772254	9.60868e-05	0.250143	164.9	120.353	51.7086	2.5079	46.5015	0.428077	49.5915	0.615251	95	24669	0.123552	134173	205464	22733.1	87377.7	17263.4	357.786	12859.9	1670.69	7502.1	1047.41	1927.97	186.695	805.579	79.6141	4047.27	0.0734115	0.449815	0.0428559	79261.7	4770.89
91-16_03	rim	0.0507793	0.00960923	0.0632991	0.0121738	0.00235701	4.51348e-05	0.00825022	0.000340842	0.214812	231.55	385.135	62.3206	11.6253	47.5844	0.91013	52.9662	2.17942	83	20286.4	0.0678088	113162	215027	23783.9	91405.8	18499.7	298.529	13171.1	1584.8	6505.8	854.332	1437.07	117.587	463.273	41.5236	2913.79	0.0584676	0.673939	0.118235	77901.7	2585.43
91-16_38	rim	0.0514859	0.00337296	0.057582	0.00341571	0.00241652	2.02217e-05	0.0082912	0.00013895	0.282518	261.175	149.98	56.8463	3.27964	48.7844	0.407739	53.2281	0.888825	93	25257.9	0.187937	123258	195567	22245.4	89628.1	17982	286.911	14065.1	1776.95	7725.28	1093.36	1907.43	167.512	697.749	62.1931	3928.25	0.0551544	0.323863	0.0865984	96077.9	2842.15
91-16_41	rim	0.0553117	0.00415617	0.0580182	0.00379488	0.00245469	2.22139e-05	0.00788491	0.000142089	0.275506	433.38	163.87	57.2651	3.64216	49.554	0.447894	50.6301	0.909211	87	15787.8	0.15188	125803	206471	23898.7	98213.4	19094.7	273.623	14958.6	1614.18	5672.81	561.946	601.179	34.703	90.4872	4.56972	1292.88	0.0494963	0.313623	0.0209768	86433.7	2250.91
91-16_46	rim	0.0410034	0.00300138	0.0473609	0.00296663	0.00248815	2.46495e-05	0.00847526	0.000138206	0.260334			46.9854	2.87623	50.2286	0.496985	54.4048	0.883936	85	25096.9	0.124119	121776	202429	22788.3	92298.3	17780.3	287.933	13182	1655.13	7242.17	1107.32	1999.64	195.944	813.114	79.512	4195.53	0.0574984	0.703409	0.0856082	83488.5	2521.72
91-16_17	rim	0.0642181	0.00942608	0.0593805	0.0058993	0.00250449	4.91636e-05	0.0082123	0.0002833	0.347236	750.005	282.387	58.5717	5.65444	50.5581	0.991224	52.7237	1.81162	89	14820.6	0.0286635	114497	222754	25009.6	96251.8	20516.4	218.893	15347.5	1661.34	5801.69	600.642	756.664	45.8161	138.124	11.428	1552.67	0.0377127	0.796916	0.0724205	67923.6	3420.86
91-16_10	rim	0.0439129	0.00403189	0.0488435	0.00363065	0.00250518	5.01135e-05	0.00842942	0.000181925	0.290348			48.4218	3.51497	50.572	1.01038	54.1118	1.16333	88	19602	0.0862889	109861	214340	24479	93001.5	24663	460.768	23658.1	2618.3	8457.8	796.849	911.479	48.4687	142.699	10.4285	1909.92	0.0583167	0.634349	0.116872	49418.8	8753.62
91-16_25	rim	0.0525937	0.003493	0.0568734	0.00316105	0.00250592	2.27792e-05	0.00811959	0.000138322	0.306502	322.28	151.83	56.1658	3.0372	50.5869	0.459268	52.1309	0.884945	92	29970.4	0.132245	123524	200921	23396.4	92302.1	18029.9	232.73	14338	1927.21	8802.47	1242.14	2096.1	177.506	684.184	60.5268	4260.46	0.0442523	0.549928	0.137565	66078.4	3192.91
91-16_28	rim	0.0513581	0.00286106	0.0568345	0.00294978	0.00252507	2.0291e-05	0.00813758	9.59667e-05	0.227221	257.47	132.39	56.1285	2.83434	50.973	0.409094	52.2459	0.614296	92	34895.8	0.149965	110363	191252	22867	96438.8	20363.2	216.994	18736.5	2431.55	10517.2	1361.68	2029.28	153.871	521.117	44.3176	4110.27	0.0339628	0.435905	0.0831258	86585.4	3782.04
91-16_32	rim	0.0570993	0.00513016	0.0610564	0.0052538	0.00253022	3.97461e-05	0.00811112	0.000185848	0.266279	494.485	199.975	60.1767	5.02782	51.0767	0.80133	52.0767	1.18875	85	22919.6	0.0727328	123264	206295	23940.7	96462.5	18410.7	313.295	14192.5	1724.7	7368.96	970.463	1639.92	134.92	518.829	47.3294	3311.46	0.0592534	0.3015	0.100684	71690.2	2870.87
91-16_16	rim	0.0667387	0.0126951	0.0646265	0.00810859	0.00253663	4.3163e-05	0.00867829	0.000252508	0.231903	831.48	405.53	63.5874	7.73366	51.206	0.870214	55.7025	1.61405	86	15304.3	0	118183	223722	25139.7	95618.1	19269.6	359.464	13696.7	1523.83	5754.46	630.415	887.818	60.0416	252.353	21.316	1851.94	0.0676449	1.04021	0.11759	63491.8	5680.48
91-16_27	rim	0.0508348	0.00301815	0.0578129	0.00323966	0.00254798	2.24868e-05	0.00835922	0.00010823	0.23105	231.55	132.39	57.0681	3.10996	51.4348	0.453354	53.663	0.692517	93	37063.8	0.0879484	123850	210025	24874.5	99546.2	19925.7	236.171	16026.4	2092.91	9690.26	1466.01	2646.96	230.489	875.191	77.1676	5295.81	0.0404042	0.487073	0.10158	50785.1	2814.23
91-16_26	rim	0.047776	0.00310977	0.0545862	0.00326845	0.0026402	2.70147e-05	0.00845828	0.000133898	0.264383	87.13	148.12	53.966	3.14717	53.294	0.54459	54.2962	0.856427	99	31151.7	0.0653399	116759	199956	23048.7	93484.6	19209.2	246.026	15542.2	2051.62	9263.3	1261.05	2062.92	170.909	644.119	54.8182	4193.82	0.0435306	0.135738	0.158509	69535.1	3522.59
91-16_34	rim	0.0543069	0.00435408	0.0611273	0.00407161	0.00266361	2.69828e-05	0.00837213	0.000127967	0.229473	383.385	179.607	60.2445	3.8963	53.7659	0.543934	53.7455	0.818594	88	13182.6	0.031915	135464	227000	27302.2	106408	21510.7	141.7	15416.3	1627	5602.61	532.193	566.823	31.36	78.1555	4.73676	1213.27	0.023789	0.396665	0.0220821	39731.8	2777.51
91-16_01	rim	0.0629118	0.00801062	0.067399	0.00568887	0.00282476	5.52426e-05	0.00866839	0.000286202	0.391167	705.565	272.965	66.2282	5.41183	57.0143	1.11343	55.6392	1.82937	82	23712.2	0.19035	119514	225871	24616.3	91301.8	17999.8	1317.52	13630.8	1773.09	7830.91	1030.12	1775.3	137.417	528.927	45.2929	3517.05	0.257149	0.498444	0.161965	46999.2	3895.32
91-16_09	rim	0.0438995	0.00430904	0.0533757	0.0046659	0.00284688	6.66376e-05	0.00895802	0.000194116	0.24789			52.7999	4.49775	57.4601	1.34307	57.49	1.24063	91	26909.4	0	117755	232574	26248.3	96044.9	24614.6	600.488	18445.6	2397.83	9320.56	1077.69	1567.18	112.668	365.192	26.1531	3148.89	0.0861559	1.13466	0.129298	21184.4	8109.96
91-16_08	core	0.0461312	0.00636745	0.0592194	0.00797006	0.00299083	5.15369e-05	0.00950944	0.000282878	0.221027	400.05	-94.435	58.4172	7.64032	60.3611	1.03857	61.0122	1.80667	95	23134.4	0.0297242	124221	225565	24290.9	90239.5	16949.4	1439.07	12288.4	1524.38	7084.38	1026.91	1897.75	164.117	656.177	57.2893	3802.25	0.304846	0.710957	0.0755564	49630.2	4203.04
91-16_19	core	0.081754	0.0126554	0.08935	0.00996101	0.00306392	5.31997e-05	0.00991839	0.000304542	0.275421	1239.81	307.408	86.8977	9.28485	61.834	1.072	63.6231	1.94422	69	23899.6	0.0615646	122109	224372	23905.3	89413.9	17591.1	1873.07	13463.8	1716.58	7816.4	1065.24	1807.86	145.624	542.568	43.6344	3604.92	0.372089	1.22049	0.0777017	52598.3	3589.73
91-16_33	core	0.046299	0.00210453	0.0595764	0.00268493	0.00306923	3.54923e-05	0.00941146	0.000112239	0.264624	13.06	107.4	58.7594	2.57325	61.941	0.715184	60.3864	0.717535	97	23556.6	0.0655748	137607	228285	25761.4	97998.3	21625.5	466.895	16004.2	2069.12	8360.88	1006.03	1559.17	125.486	472.951	38.7555	3202.4	0.076726	0.475562	0.0453794	18113.4	6348.46
91-16_15	core	0.0515248	0.00696671	0.0665125	0.00740109	0.00308409	5.66922e-05	0.00996275	0.000311155	0.280676	264.88	285.155	65.3846	7.04641	62.2403	1.14235	63.9062	1.98635	97	24315.4	0	122288	223653	23804.5	87372.5	16897.1	1040.31	12981.8	1691.63	7409.45	1012.58	1627.61	124.29	438.716	34.8936	3238.09	0.21474	0.756533	0.01456	46835.6	3766.55
91-16_05	core	0.0542827	0.00793163	0.0632922	0.00707962	0.00310375	6.48001e-05	0.00957412	0.00025627	0.239298	383.385	332.207	62.314	6.76076	62.6365	1.3057	61.4252	1.63669	98	20403.8	0.0303148	125371	231549	25444.6	94571	18306.6	1270.24	13386.2	1640.24	6981.13	894.718	1413.91	110.423	375.091	30.3933	2824.54	0.248071	0.733796	0.0463428	41001.5	5325.45
91-16_40	core	0.0518759	0.00342127	0.0658123	0.00394251	0.0031112	3.19486e-05	0.0094764	0.000159001	0.280085	279.69	156.46	64.7177	3.75623	62.7867	0.643749	60.8012	1.01589	93	25946.4	0.0641918	123948	214294	25398.4	102881	21254.2	324.278	17450.4	2194.89	8804.76	1058.12	1547.42	113.537	376.606	30.0487	3125.73	0.0514774	0.132666	0.0443523	45640.7	2783.58
91-16_14	core	0.056741	0.00956712	0.0600912	0.00827472	0.00312205	5.75747e-05	0.00954472	0.000307319	0.233821	479.67	379.582	59.2526	7.92585	63.0052	1.16009	61.2374	1.96265	96	27448.1	0.0317829	118752	217127	23783.9	87602.3	17517.3	1112.76	14028.4	1823.22	8371.73	1146.47	1785.12	125.641	442.386	36.0082	3535.63	0.217013	0.950879	0.0778683	54926.6	4348.37
91-16_06	core	0.0610767	0.0089259	0.0832725	0.0120006	0.00318708	6.44589e-05	0.0107256	0.000393876	0.254822	642.61	313.858	81.2169	11.2487	64.3155	1.29872	68.7734	2.51242	83	18269.8	0	127795	239087	26455.2	97857.3	18608.3	1501.03	12973.2	1512.57	6338.62	808.794	1335.56	97.8614	365.827	29.6649	2637.7	0.295349	0.550725	0.0755007	34020.6	3025.79
91-16_45	core	0.0499477	0.00240694	0.0676618	0.00307107	0.00319559	3.27527e-05	0.0099125	0.000132054	0.293509	190.82	112.945	66.4782	2.92104	64.487	0.659897	63.5855	0.843618	95	26759.1	0.0636753	131798	212240	24054.3	92783.3	16852.3	826.447	13505.4	1724.7	7988.74	1129.49	1857.89	150.971	557.695	50.0211	3746.06	0.167477	0.26267	0.0659122	50414.4	3904.73
91-16_44	core	0.0499983	0.00233604	0.0689953	0.00309946	0.00319992	3.05208e-05	0.0100914	0.000134946	0.297675	194.525	107.392	67.7455	2.94437	64.5743	0.614926	64.7276	0.861938	95	26374.3	0.0616112	129884	214716	23951.1	95613.8	17318.5	879.735	13772.7	1774.61	8021.84	1139.53	1817.62	143.39	542.881	48.6309	3692.05	0.174145	0.127114	0.0637868	48763.1	3719.32
91-16_29	core	0.0576191	0.00374346	0.081211	0.00484541	0.00320845	2.70475e-05	0.0104373	0.000149083	0.2394	516.705	144.425	79.2828	4.55072	64.7462	0.544942	66.9346	0.951811	83	23118.9	0.062338	137557	217232	24519.2	97738.5	17312.5	1550.82	13029.7	1618.28	7453.49	1059.04	1848.21	157.885	574.389	47.0841	3686.61	0.315673	0.323476	0.0863698	42719.9	2976.53
91-16_30	core	0.0564959	0.00295146	0.0822904	0.00438554	0.003292	3.52763e-05	0.0105707	0.000156569	0.277923	472.265	114.8	80.296	4.11479	66.4294	0.710673	67.7858	0.999419	83	26124.5	0.0623886	136273	218638	24851.7	99028.4	17407.3	1818.63	12923.8	1640.36	7832.84	1158.55	2133.31	196.349	757.156	62.8478	4308.22	0.370688	0.0647291	0.108031	39132.5	3176.82
91-16_02	core	0.0777064	0.0119606	0.0902498	0.00862878	0.00331961	8.26196e-05	0.010461	0.000341012	0.340952	1138.89	310.03	87.736	8.03647	66.9856	1.6644	67.0856	2.17585	73	22413.6	0.165225	130166	238175	25113.6	94241.6	17622.8	1838.62	11539.7	1424.7	6523.02	996.346	1849.67	156.219	631.352	50.5041	3684.09	0.394168	0.42326	0.168625	25560.4	3371.71
91-16_42	core	0.0536989	0.0029552	0.076873	0.00374531	0.00336533	2.914e-05	0.0105406	0.000132472	0.257956	366.72	125.912	75.2008	3.53182	67.9066	0.587009	67.5935	0.84585	89	28564.2	0.0643772	123600	209211	24093.9	98349.7	19714.1	659.535	16801.9	2215.04	9310.66	1117.62	1460.17	90.9986	247.917	16.4228	2933.13	0.110788	0.797382	0.0444492	55581	3489.74
91-41 paragneiss
91-41_12	rim	0.0603935	0.00410538	0.0519201	0.0032716	0.00200978	2.92855e-05	0.00633233	0.00012782	0.32034	616.685	150.905	51.3958	3.15815	40.5814	0.590738	40.6921	0.819089	76	15030.2	0	113977	183401	18097.9	60937.4	9684.97	331.076	6599.05	918.644	4477.36	632.47	1131.91	97.2692	381.924	32.8492	2276.42	0.126608	0.304013	0.102029	23276.4	2308.89
91-41_35	rim	0.0474807	0.00222231	0.0473883	0.00206551	0.00203154	1.99342e-05	0.00726895	8.45583e-05	0.266888	72.315	116.655	47.0119	2.00265	41.0204	0.402099	46.6891	0.541751	99	17915.2	0.196386	149461	264385	30515.4	121519	26674.7	571.661	24312.3	2545.5	7995.37	729.058	805.235	50.7391	168.079	11.666	1764.78	0.0686276	0.490159	0.0660195	48952.7	4568.83
91-41_26	rim	0.0476311	0.00228106	0.0459286	0.00203	0.00215515	2.40219e-05	0.00708946	0.000100316	0.320144	79.72	111.1	45.5958	1.97096	43.5135	0.484492	45.5403	0.642598	99	15505.8	0	103231	182432	18792.5	62695.1	9303.05	344.969	5099.72	777.613	4098.45	663.65	1292.78	126.796	520.191	46.6899	2650.11	0.153115	0.411173	0.0898679	36761.7	5692.16
91-41_44	rim	0.0469635	0.001764	0.0471875	0.0016158	0.00216333	1.47481e-05	0.0073403	7.64597e-05	0.304198	55.65	144.425	46.8173	1.56705	43.6785	0.297448	47.1458	0.489961	99	27040.3	0.0984799	158523	266898	28637.2	103761	16800.8	491.104	9833.74	1410.26	7372.9	1246.91	2535.28	250.825	1076.77	96.0899	5205.87	0.116808	0.511769	0.132431	87112.8	7466.32
91-41_22	rim	0.0467113	0.00214396	0.0464564	0.00202215	0.00220759	2.80252e-05	0.00727817	9.49498e-05	0.299712	35.28	107.4	46.1081	1.96236	44.5712	0.565205	46.7482	0.608187	98	16498	0	100831	188040	19803.6	66273.4	11402.1	395.153	6882.36	1000.78	4896.84	685.935	1201.63	104.558	420.587	36.1009	2448.81	0.136373	0.363328	0.0887081	22306.9	5457.95
91-41_17	rim	0.071869	0.00470068	0.0764307	0.00460691	0.0022823	2.21849e-05	0.00792521	0.000143462	0.300319	983.335	133.335	74.7836	4.34594	46.0779	0.447385	50.8878	0.917952	61	19438	0.0722014	87057.1	165476	18715.5	71929.3	12193.9	173.031	8240.26	1067.88	5346.93	788.175	1431.87	116.646	443.891	37.1019	2817.68	0.0527722	0.372618	0.0727379	59910.5	2412.8
91-41_25	rim	0.0510359	0.00475108	0.0538852	0.00459501	0.00229248	2.73894e-05	0.00790452	0.00015542	0.230576	242.66	214.79	53.2909	4.42728	46.2831	0.552334	50.7555	0.994422	95	17323.8	0	85220.2	164144	18345.7	70912.2	12583.5	115.178	9188.87	1064.6	4700.04	701.282	1187.97	102.339	392.281	31.453	2415.32	0.0327462	0.344559	0.0774984	54213.4	1628.13
91-41_45	rim	0.0517894	0.00292094	0.0555911	0.0029398	0.00232701	1.51548e-05	0.00785596	9.45105e-05	0.227493	275.99	162.015	54.9332	2.82807	46.9794	0.305601	50.4449	0.605119	91	34963.9	0.0926511	134467	247572	29178.9	118347	22908.9	254.788	18056.7	2146.14	9840.35	1516.17	2815.12	254.195	1020.4	90.7371	5696.62	0.0382984	0.740794	0.137053	95066.1	3073.42
91-41_16	rim	0.0554041	0.00466615	0.0565188	0.0041382	0.00240987	2.82817e-05	0.00786123	0.000205854	0.357643	427.825	188.865	55.8251	3.97726	48.6502	0.570262	50.4786	1.31695	89	18823.8	0	83609.6	165940	19110	73784.2	13134.6	142.852	9574.82	1141.33	5291.21	796.384	1345.8	118.796	448.042	37.0655	2746.09	0.0389436	0.427603	0.0186697	46941.3	1886.81
91-41_19	rim	0.0466113	0.00409373	0.0514105	0.00399948	0.00245768	2.65507e-05	0.00814863	0.0001582	0.249557	27.875	199.97	50.9038	3.86259	49.6143	0.535333	52.3166	1.01197	97	12650	0	89970.5	176481	19725.5	75355.4	12931.4	86.9115	8976.13	1029.98	4197.38	506.99	645.707	40.2921	101.075	6.13042	1300.19	0.0246623	0.199234	0.0428678	52141.7	1979.71
91-41_27	rim	0.0541021	0.00400374	0.0602394	0.00403081	0.0024928	2.74432e-05	0.00830129	0.000170269	0.306533	375.98	200.898	59.3946	3.86049	50.3223	0.553309	53.2927	1.08897	89	18826	0.0272419	88818.7	174961	19766.9	76452.6	16191.9	251.281	12864.8	1486.05	5919.35	727.69	1062.29	75.5617	247.449	18.4485	2131.44	0.0532271	0.349622	0.131372	51045.3	2035.23
91-41_33	rim	0.0456645	0.00189033	0.0520721	0.00218	0.00253291	1.5851e-05	0.0082395	6.96433e-05	0.201896			51.5425	2.10426	51.1311	0.319576	52.8976	0.446196	97	5189.02	0.0596491	153909	265434	30412.1	120895	21989.5	268.41	13610.4	1097.32	2868.03	231.022	230.471	12.3212	39.8581	3.02495	516.697	0.047433	0.277862	0.0267363	85406.5	6340.43
91-41_02	rim	0.048451	0.00264482	0.0518981	0.00266378	0.0025487	3.48549e-05	0.00791284	0.000117047	0.288191	120.46	135.16	51.3746	2.57155	51.4493	0.702705	50.8087	0.749113	98	13514.9	0	90051.5	172438	19648.3	77708.2	16285.1	187.194	13954.3	1634.42	5366.55	460.22	414.609	19.9935	50.504	2.79272	948.12	0.0379634	0.455152	0.0565509	27146.6	4613.58
91-41_01	rim	0.0498902	0.00176406	0.0551603	0.0018707	0.00258633	3.23021e-05	0.00808353	0.000101409	0.369913	190.82	113.873	54.5186	1.80056	52.208	0.651212	51.9003	0.649089	95	22294.9	0	90671.4	171959	19368.5	73134.4	16655.6	304.744	16293.7	2067.31	7639.18	671.448	671.697	35.68	95.6474	4.60586	1479.08	0.0565547	0.331289	0.0853647	22713.5	9220.99
91-41_31	rim	0.0440798	0.00155455	0.0529882	0.00183439	0.00259778	1.97055e-05	0.00875189	8.29516e-05	0.273786			52.4263	1.76924	52.4389	0.39726	56.1728	0.530968	93	27825.2	0.051298	140451	246469	28776.6	116271	23142.2	423.099	18670.6	2203.59	8999.12	1141.44	1691.45	126.349	436.431	34.7285	3430.41	0.0622278	0.682639	0.0689788	85487.3	6865.4
91-41_42	rim	0.0469075	0.00139235	0.0565259	0.00168863	0.00260203	1.76659e-05	0.00874381	7.62409e-05	0.291877	42.69	79.62	55.832	1.62332	52.5245	0.35614	56.1212	0.488162	99	31085.7	0.0724273	142359	249110	28514.7	113513	23413.3	655.92	19248.6	2381.38	9990.1	1329.5	2110.99	164.943	596.871	47.2931	4249.6	0.0944592	0.687408	0.0730465	83545	10015.4
91-41_46	rim	0.0498086	0.00189022	0.0585003	0.00222518	0.00262376	2.02391e-05	0.00852895	8.74316e-05	0.269504	187.12	88.875	57.7277	2.1349	52.9625	0.408006	54.748	0.559635	94	28191.3	0.0762714	142772	258174	29873.4	121244	23775.7	570.636	19487.7	2257.1	9284.59	1199.08	1839.92	142.868	524.32	43.125	3749.31	0.0810469	0.609876	0.128209	76354.1	4860.3
91-41_32	rim	0.0470975	0.00141304	0.0553431	0.00162615	0.00262528	1.65732e-05	0.00854462	7.36611e-05	0.293392	53.8	70.36	54.6946	1.56502	52.9933	0.334103	54.8482	0.471758	99	27865.2	0.0540797	147032	253277	28693.9	114581	22239.2	581.647	17227	2094.72	8990.92	1195.52	1854.71	146.233	511.438	40.8698	3748.77	0.0908487	0.719711	0.0969593	71631.1	9483.29
91-41_47	rim	0.0491016	0.00183522	0.0579111	0.0021664	0.00265058	2.06492e-05	0.00857122	8.61683e-05	0.268737	153.79	88.875	57.1623	2.07968	53.5033	0.416264	55.0182	0.551557	96	32241.3	0.0988144	148175	266376	30751.9	122983	24586.9	823.517	19925.3	2378.3	10327.6	1442.08	2372.95	199.755	775.82	70.4402	4861.05	0.113748	0.671665	0.172747	49913.7	6472.6
91-41_18	core	0.0510374	0.00313336	0.0655488	0.00369411	0.00300589	4.08739e-05	0.00946414	0.000142289	0.266775	242.66	147.202	64.4667	3.52046	60.6645	0.823676	60.7229	0.909244	94	5102.24	0	96060	187399	21346.9	82647.5	15186.9	211.596	11272.9	1113.68	2951.43	198.702	141.795	5.5521	15.0517	1.23828	362.338	0.04944	0.155702	0.0246069	25962.9	3373.12
91-41_09	core	0.056971	0.00405753	0.0741849	0.0042241	0.00303654	2.93644e-05	0.00990496	0.000190021	0.336922	500.04	157.387	72.663	3.99318	61.2823	0.591722	63.5373	1.21342	86	18596.7	0.0719448	75764.5	148569	17443.6	66612.2	13816.7	145.682	11024.2	1270.91	5352.11	733.472	1208.66	90.908	334.167	26.6722	2393.88	0.0360873	0.45654	0.12014	65328.5	1489.58
91-41_37	core	0.0536668	0.00180314	0.0746302	0.00232545	0.00304244	1.9825e-05	0.0101806	9.79959e-05	0.308917	366.72	75.92	73.0838	2.19781	61.4012	0.399492	65.2966	0.626349	88	22757.1	0.0346919	163985	264194	31620.2	120876	22587.4	1443.23	17589	2026.05	7844.33	980.643	1404.65	92.2093	271.924	21.1597	2770.59	0.221363	0.450394	0.0583131	53273.8	4761.11
91-41_43	core	0.0510047	0.00154826	0.0745178	0.00223908	0.00314243	2.19017e-05	0.0106112	0.000102036	0.320023	242.66	70.36	72.9776	2.11644	63.4159	0.441296	68.0437	0.651898	93	29073.8	0.0544224	152433	253896	30290.4	118594	24856.4	938.306	21641.3	2585.04	10188.3	1191.62	1597.95	105.644	332.953	25.8039	3253.97	0.123682	0.761369	0.0853817	66292.6	6721.98
91-41_36	core	0.0480493	0.00188865	0.069448	0.00258579	0.00319691	2.35548e-05	0.0105337	0.000114014	0.2907	101.94	92.5825	68.1755	2.4555	64.5136	0.474577	67.5495	0.728237	99	24809.6	0.127419	156747	250904	29839.2	118646	24986.9	2203.14	22483.3	2644.37	9947.91	1080.43	1407.71	95.7868	289.574	21.0486	2894.55	0.284171	0.457992	0.154206	48993.2	6468.34
91-41_08	core	0.0527754	0.00242953	0.0707853	0.00303898	0.00324224	4.10249e-05	0.00986087	0.000146883	0.346954	320.43	105.545	69.4444	2.88213	65.4268	0.826525	63.2559	0.938247	90	13423.1	0.0480292	95242.9	167316	19269.5	71956	14122.5	1297.17	11718.4	1330.96	4914.33	533.407	673.441	42.597	128.051	9.28226	1386.78	0.30827	0.435198	0.0541081	20465.5	4246.68
91-35 leucosome
91-35_26	rim	0.0474335	0.00276415	0.0430495	0.00225931	0.00204034	1.94425e-05	0.00678981	0.000104707	0.293839	77.87	133.315	42.797	2.19958	41.1977	0.392176	43.622	0.670846	98	22688.5	0.128539	121813	202442	23185.8	93042.6	18789.9	813.023	13434.9	1607.66	7075.18	993.127	1795.1	168.844	704.734	66.2599	3728.06	0.15644	0.594643	0.0885324	77302.8	5600.6
91-35_43	rim	0.0506863	0.00340849	0.0489927	0.00311454	0.0022992	2.71898e-05	0.007014	0.000107488	0.241063	233.4	155.535	48.5662	3.01493	46.4187	0.548305	45.0573	0.688515	92	23376.3	0.144112	116462	199844	23864.7	99800	20809.5	425.081	17424.9	2090.91	8112.7	968.985	1293.25	92.7927	333.05	27.9113	2715.98	0.0682463	0.765324	0.019772	80817.4	3724.9
91-35_07	rim	0.0669216	0.00835062	0.0685634	0.00706416	0.00250173	4.55081e-05	0.0083565	0.000282163	0.327723	835.18	262.947	67.3353	6.71275	50.5024	0.917524	53.6456	1.8041	77	30300.1	0.0616361	119359	225118	25983.8	110592	23715.9	280.156	21099	2516.5	10287	1182.95	1535.04	97.8737	314.837	22.5598	3153.27	0.0382889	1.15801	0.0480479	82661.3	4049.76
91-35_03	rim	0.0493853	0.00484754	0.0563042	0.00488724	0.00255887	4.23875e-05	0.008584	0.000207034	0.277862	164.9	224.04	55.6188	4.69806	51.6544	0.854558	55.0999	1.3236	99	31074.1	0	117654	215925	24559.6	103041	22125.6	618.153	18668.8	2189.41	9271.86	1210.12	1897.51	149.435	570.894	48.757	3876.71	0.0929855	0.710406	0.0804703	99540.1	6547.69
91-35_16	rim	0.0562312	0.0139037	0.0464897	0.0128451	0.00263515	5.0042e-05	0.00852019	0.000344606	0.146383	461.155	470.325	46.1404	12.4633	53.1922	1.0088	54.692	2.2029	83	22811.3	0.136432	137159	239085	25566.1	104541	19365.4	238.162	14916	1665.14	7087.48	935.4	1412.3	101.171	330.444	24.9647	2804.28	0.0428407	1.20553	0.0160836	82762.9	2345.39
91-35_08	rim	0.0496482	0.00435085	0.0581811	0.00438401	0.0026476	4.57352e-05	0.00872011	0.000185344	0.282076	188.97	183.305	57.4214	4.20688	53.4432	0.921969	55.9697	1.18486	97	28078.3	0	127302	234965	26412.2	108264	22239.2	816.653	17347.1	2152.13	9270.26	1183.96	1914.2	158.81	596.365	51.6133	3904.94	0.127112	0.892414	0.206263	59831.3	11572.9
91-35_02	rim	0.0571865	0.00617564	0.0626231	0.0053567	0.00265803	4.44976e-05	0.00831082	0.000216545	0.304608	498.19	238.86	61.6749	5.11874	53.6535	0.89701	53.3536	1.38473	85	33598.4	0	115573	211338	24239.4	101441	21163.5	647.731	17640.1	2116.67	9648.87	1328.08	2259.99	194.224	768.422	69.506	4620.22	0.102488	0.673224	0.151017	106741	6610.5
91-35_25	rim	0.0478665	0.00202348	0.0561954	0.00235526	0.00267308	2.66814e-05	0.00858186	9.7837e-05	0.272009	100.09	90.73	55.5143	2.26457	53.9568	0.537853	55.0862	0.626038	99	23446.7	0.103086	115786	194779	23139.5	93981.2	19886.6	475.653	15254	1862.62	7678.66	997.019	1657.02	141.306	553.977	51.2941	3400.61	0.0834913	0.353357	0.0236714	82588.4	7178.87
91-35_20	rim	0.0458161	0.00537072	0.048863	0.00431805	0.00267615	5.3342e-05	0.00810449	0.000211344	0.295092			48.4406	4.18034	54.0186	1.07528	52.0343	1.35175	92	26523.6	0	124077	235479	26520.8	111037	23259.5	611.123	18784	2248.75	9201.96	1098.23	1502.91	109.812	386.134	28.6154	3125.7	0.0893835	0.709764	0.14592	74049.1	7251.51
91-35_15	rim	0.054664	0.010861	0.0649546	0.0127256	0.00268144	5.30728e-05	0.00894519	0.000360018	0.205431	398.2	392.54	63.9002	12.1333	54.1254	1.06985	57.408	2.30046	89	23067.8	0.0695008	135737	241776	25869	104844	19625.6	282.327	15021.5	1690.59	7224.18	937.773	1365.76	99.9647	317.63	22.2526	2743.38	0.0502699	0.771379	0.047928	79505.4	2348.87
91-35_28	rim	0.0476597	0.00335367	0.0583801	0.00349568	0.00270691	2.37808e-05	0.00887071	0.000145691	0.27429	83.425	159.235	57.6124	3.35389	54.6387	0.479365	56.9321	0.931437	98	23177.1	0.0968826	111296	195633	23449.8	98568.2	21597.5	173.012	18961.6	2237.84	8533.75	957.349	1143.58	66.7588	180.676	12.6422	2361	0.0261373	0.265445	0.0889406	89937.7	2658
91-35_01	rim	0.0581362	0.00891306	0.0601769	0.00637116	0.00270727	4.61281e-05	0.00847688	0.000254417	0.28348	600.025	336.067	59.3347	6.1021	54.6459	0.929834	54.4152	1.62656	91	28427.4	0.106699	118984	217796	24984.8	103268	20973.3	574.119	16977.9	1980.46	8638.35	1153.32	1873.12	155.06	580.153	50.195	3811.85	0.0930144	0.0992434	0.03711	99434.6	5649.48
91-35_05	rim	0.0463542	0.0042564	0.0571995	0.00486522	0.00276975	4.99733e-05	0.00886361	0.000214288	0.284235	16.765	216.635	56.4791	4.67294	55.9054	1.00728	56.8867	1.3696	99	27323	0	123635	229765	26083.9	108081	23618.3	658.575	17958	2097.39	9158.24	1172.18	1934.68	171.509	671.737	57.825	4007.93	0.0977633	1.53203	0.205508	76202.3	8433.77
91-35_35	rim	0.0542098	0.00257307	0.0651001	0.00271791	0.0027743	2.62639e-05	0.00881232	9.10947e-05	0.2476	388.94	74.9925	64.039	2.5914	55.9972	0.529384	56.559	0.582905	87	25684.4	0.0935838	119706	200767	23303	96100.7	19339.5	613.893	15660.8	2003.6	8448.36	1090.04	1663.5	130.403	453.748	36.3566	3374.04	0.107842	0.638996	0.0214368	73702.6	8879.57
91-35_04	rim	0.0499046	0.00478017	0.063559	0.00547204	0.00284108	6.348e-05	0.00942279	0.000227787	0.280786	190.82	207.38	62.5687	5.22435	57.3432	1.27944	60.4588	1.45507	96	28147.8	0	137147	241986	28597.1	117001	22149.2	849.743	16840.7	2057.39	9061.54	1247.09	2174.39	191.411	764.01	69.3636	4446.26	0.134509	0.933342	0.180874	50636.5	8148.59
91-35_24	rim	0.0488677	0.0023437	0.0664403	0.00319864	0.00287439	3.20101e-05	0.00994409	0.000147659	0.308434	142.68	108.317	65.3158	3.04582	58.0146	0.64514	63.7871	0.943131	97	28754.4	0.0327612	115943	198837	23648	98591.4	20378.6	435.541	16941.4	2139.76	9020	1175.96	1782.46	132.159	459.172	36.7839	3586.54	0.0716623	0.876678	0.112902	74562.5	5191.17
91-35_42	rim	0.0474285	0.00280513	0.061074	0.00379682	0.00287716	3.8589e-05	0.00916942	0.000207136	0.363371	77.87	127.76	60.1935	3.63356	58.0704	0.777733	58.8405	1.32353	97	25578.4	0.0599488	113518	199667	24210.5	98852.5	20928.4	367.405	16685.2	1995.82	8064.93	1062.72	1651.06	128.322	452.665	37.4032	3332.17	0.0601083	0.306208	0.143961	80684.1	3207.32
91-35_10	rim	0.0684907	0.0122866	0.0796747	0.00949014	0.00288506	6.22317e-05	0.00983713	0.000338661	0.289031	883.33	377.755	77.8391	8.92519	58.2295	1.25422	63.1043	2.16215	79	23178.1	0	145760	247764	28286.7	116614	21472.2	1140.46	16328.4	1875.13	7887.95	1015.49	1543.14	121.665	441.63	35.4431	3157.36	0.186206	0.853247	0.165129	50891.1	3958.66
91-35_32	core	0.0514873	0.00273052	0.0688004	0.00353437	0.00297261	2.12548e-05	0.00972426	0.00011974	0.239696	261.175	94.4325	67.5605	3.35804	59.9939	0.428335	62.3838	0.765199	92	28992.4	0.136777	109458	193361	24094.8	100828	21701.9	199.558	18815.4	2278.86	9362.64	1199.41	1743.1	121.017	366.209	27.3258	3457.06	0.0301917	0.617272	0.169334	98296.1	2753.94
91-35_27	core	0.0528626	0.00239342	0.0721446	0.00308439	0.00303558	2.7406e-05	0.00996891	0.000133363	0.312913	324.13	108.32	70.7326	2.92149	61.263	0.552259	63.9455	0.85193	89	28760.9	0.159331	116658	194345	23690.2	96651.7	20596.3	350.159	16631.7	2109.44	8813.52	1148.39	1716.53	134.397	499.39	42.5219	3541.22	0.0578398	0.720504	0.0658328	77496.4	5612.47
91-35_09	core	0.0496787	0.00425998	0.0678602	0.00485369	0.00304255	6.43031e-05	0.0100649	0.000224646	0.312056	188.97	179.6	66.6669	4.61539	61.4033	1.29577	64.558	1.43415	96	27906.9	0.0643473	132288	241350	26975.1	110361	21129.6	840.809	16777.9	2115.25	9186.22	1148.36	1674.92	121.682	419.042	33.8333	3397.83	0.136523	1.14107	0.100226	51631.6	9918.44
91-35_41	core	0.0480424	0.00305779	0.0644408	0.003759	0.00306681	2.43778e-05	0.00989485	0.000142962	0.247685	101.94	153.68	63.4102	3.58601	61.8922	0.491223	63.4728	0.913207	99	29895.7	0.0925911	117111	206992	24521.2	98405.9	21207.5	245.083	17452	2073.71	8837.71	1228.04	1995.75	156.641	564.741	49.6586	3994.83	0.0389466	0.441537	0.0211797	60854.7	2465.89
91-35_45	core	0.044852	0.00176125	0.0605945	0.00234848	0.00308135	2.21771e-05	0.00980661	0.000104451	0.274814			59.7346	2.24873	62.1851	0.446872	62.9095	0.667659	94	30219.1	0.0614951	117602	197039	23254.7	95861.8	19841.5	570.024	16873	2249.19	9537.26	1184.2	1663.28	114.973	380.418	31.0464	3373.92	0.0952431	0.940967	0.10539	66798.6	7618.58
91-35_06	core	0.0575475	0.00542885	0.0727758	0.00556146	0.00310878	5.39558e-05	0.00959241	0.0002294	0.312941	522.26	204.605	71.3301	5.26415	62.738	1.08719	61.542	1.46513	85	28876.1	0	136372	237270	28089.5	115161	21729.7	862.108	16635.7	1996.77	8933.91	1252.85	2140.09	189.593	749.57	68.5406	4400.65	0.138624	1.42153	0.152182	51513.6	6819.85
91-35_33	core	0.0496214	0.00228879	0.0676345	0.00312157	0.00313414	2.393e-05	0.00994141	0.000128789	0.28069	176.01	107.39	66.4523	2.96914	63.2489	0.482167	63.77	0.822778	95	25785.3	0	126814	209298	26743.6	108933	20935.7	823.852	16207.8	1957.18	8239.42	1149.76	1930.25	164.884	651.652	59.0635	3955.61	0.136731	0.628868	0.153364	51713.7	3843.2
91-35_30	core	0.0498186	0.00185877	0.0676457	0.002519	0.00316905	2.53619e-05	0.00985915	0.000101077	0.275311	187.12	117.575	66.4628	2.39612	63.9522	0.511001	63.2449	0.646125	95	31431.6	0.0621041	124080	203652	24399.8	99364.3	20852.8	566.583	17763.3	2432.99	10282.3	1249.78	1720.95	114.45	341.471	26.264	3452.92	0.0900002	0.637355	0.149555	50731.4	7308.78
91-35_40	core	0.0467742	0.002164	0.0658263	0.00284516	0.00317655	3.10605e-05	0.0101179	0.00014112	0.322695	38.985	107.395	64.7311	2.71086	64.1034	0.625814	64.8963	0.901288	99	28453.3	0.14403	128923	210259	25373.5	103979	19636.5	650.283	15136.7	1890.65	8444.33	1213.72	2130.13	188.881	758.723	70.8574	4362.31	0.115313	0.294442	0.0988558	45997.5	5171.91
91-35_19	core	0.068777	0.0070516	0.091205	0.00783077	0.00320081	6.08339e-05	0.0100574	0.000247924	0.28711	892.28	217.585	88.6253	7.2869	64.5922	1.22566	64.5103	1.58269	68	27793.5	0	144425	251704	27869.5	110932	19896.5	1690.92	14234.6	1723.23	7947.87	1220.79	2262.01	210.686	819.866	65.9045	4579.25	0.307174	0.901401	0.0874268	44006.1	4896.53
91-35_37	core	0.0468634	0.00221195	0.0664583	0.0030516	0.00329987	3.10649e-05	0.0101742	0.000125472	0.268577	42.69	107.395	65.333	2.90579	66.5878	0.625825	65.2559	0.801476	99	27275.6	0.0307717	125412	209778	24623.3	98962.3	18303.3	610.519	14172.8	1785.5	8067.71	1191.35	2074.42	189.758	786.822	72.9908	4315.33	0.115886	0.755965	0.147971	54062.8	4720.88
91-35_34	core	0.0530144	0.00274764	0.0734031	0.0036426	0.00330679	3.0774e-05	0.0101626	0.000117414	0.232818	327.835	118.505	71.9237	3.44606	66.7274	0.619961	65.1819	0.750113	90	20904.6	0.0927743	131318	212489	25606.1	102429	18888.5	950.697	14378.2	1673.35	6991.9	924.37	1464.25	122.513	473.388	40.9715	3025.49	0.176366	0.380408	0.127575	51480.8	5048.04
Monazite standards
44069		0.0554468	0.0029258	0.510207	0.0268455	0.0209609	0.000313917	0.0673914	0.00114538	0.323012	431.53	116.655	418.588	18.0518	419.288	6.21469	420.421	6.92113	99	25347.9	0	112707	220819	27127	112806	22213.3	2848.36	16433.3	2039.67	9020.73	1172.48	1950.58	156.994	638.467	54.0469	3972.57	0.455774	1.16083	0.0577506	30446.2	3574.8
44069		0.0551912	0.00309374	0.528749	0.0305292	0.0215391	0.000308696	0.0688226	0.00117994	0.296935	420.42	119.433	430.979	20.2794	430.731	6.10787	429.058	7.12035	99	24349.5	0.0455291	112715	223631	27723.5	114740	22897.9	2941.68	17120.3	2084.93	8831.96	1148.64	1905.37	155.387	581.868	49.1814	3840.44	0.45422	0.759324	0.106287	26652.7	2879.5
44069		0.0545406	0.00286245	0.514152	0.0261696	0.0210972	0.000308005	0.06834	0.00110981	0.319056	394.495	116.655	421.237	17.5515	421.986	6.09684	426.147	6.70058	98	24254.9	0.0227972	113807	223667	27591.9	112742	22287.9	2890.5	16726.4	2033.85	8859.03	1155.04	1920.45	153.959	614.589	52.554	3896.59	0.457679	0.947226	0.129846	29694.1	3403.72
44069		0.0560974	0.00287792	0.524804	0.026335	0.0214028	0.000301353	0.067874	0.0011244	0.330126	457.45	112.953	428.356	17.5392	428.033	5.96339	423.334	6.79147	98	26196	0	111450	219967	27147.6	112457	22562	2882.62	17198.4	2144.87	9367.06	1214.98	2053.6	171.542	693.022	57.6949	4190.84	0.447381	1.14853	0.19473	29377.3	3875.06
44069		0.0560757	0.00270034	0.520448	0.0258971	0.0213582	0.000333448	0.0667515	0.00106944	0.321975	453.75	110.175	425.45	17.297	427.152	6.5988	416.555	6.46659	97	25805.7	0.0259942	108500	217255	26553.2	110299	22573.8	2708.73	18006	2173	9318.46	1194.55	1981.33	160.98	657.406	58.0988	4052.36	0.410751	0.429412	0	32090.6	4157.33
44069		0.0545623	0.00269057	0.518508	0.0249338	0.0211418	0.000308259	0.0694625	0.00110645	0.331245	394.495	111.1	424.154	16.675	422.868	6.1016	432.917	6.67348	97	26957.6	0.0241628	108130	216846	26896.3	109501	22639.1	2865.88	17279.6	2157.35	9583.52	1248.75	2179.95	180.672	753.634	66.681	4429.69	0.44298	0.997028	0.162032	30268.1	3821.03
44069		0.0562564	0.00302273	0.534193	0.027567	0.0211932	0.000307874	0.0685432	0.00116354	0.328947	461.155	118.507	434.588	18.2472	423.885	6.09368	427.373	7.02333	98	27372.6	0	107808	214617	26893.8	109302	22830.8	2838.19	17727.1	2185.73	9745.12	1299.1	2265.71	186.954	774.201	73.0198	4598.99	0.431307	0.878377	0.220137	30418.9	3859.22
44069		0.0543816	0.00319143	0.504763	0.0280063	0.0213068	0.000302317	0.0676708	0.00123588	0.32916	387.09	136.097	414.922	18.9002	426.134	5.98302	422.107	7.46553	98	25253.5	0	110236	222318	27312.4	113073	22816.1	2878.31	17265.7	2103.52	8911.46	1186.82	1991.36	164.451	671.129	57.1022	4070.86	0.443351	0.803189	0.0703723	24861.5	3171.01
44069		0.0532444	0.00284574	0.496119	0.0235046	0.0210861	0.00030148	0.0676043	0.00114636	0.357913	338.945	122.207	409.072	15.9545	421.766	5.96775	421.706	6.92567	96	24983.7	0	113759	218827	26218.7	106384	21994.3	2822.6	16831	2077.42	9044.34	1179.01	1978.31	166.852	662.639	56.8132	4043.62	0.4485	1.03533	0.152594	32677.4	4402.46
44069		0.0573936	0.00345622	0.542837	0.028538	0.0214139	0.000334815	0.0686097	0.00134442	0.372731	505.595	133.315	440.293	18.784	428.253	6.62548	427.774	8.11353	97	22448.5	0	113982	224846	28059.2	114352	23086.9	2840.75	17036.6	2006.4	8379.49	1096.73	1747.79	135.43	527.501	44.8347	3552.29	0.437907	1.2747	0.0686739	24798.4	2323.47
44069		0.0576607	0.00303761	0.540764	0.0269085	0.021038	0.0003069	0.0677825	0.00122533	0.36329	516.705	114.797	438.928	17.7355	420.815	6.07533	422.782	7.40108	96	14285.8	0.0238133	118036	228125	27969.6	111702	21981.5	1379.13	16052	1801.1	6391.93	623.327	634.883	31.9718	93.8032	6.9331	1390.92	0.224458	0.820856	0.085181	32141	2677.16
44069		0.0529773	0.00301484	0.498192	0.0276263	0.021462	0.000332027	0.0684315	0.00124825	0.328942	327.835	129.613	410.478	18.7255	429.204	6.56999	426.699	7.53487	96	23632.5	0	109368	220663	27294.2	111419	22453.6	2754.36	17083.8	2027.2	8740.7	1096.71	1772.07	142.139	547.588	46.6448	3605.15	0.429941	0.994831	0.143321	27633	2916.99
44069		0.0563141	0.00362089	0.52059	0.030311	0.0211752	0.000308976	0.0673634	0.00126119	0.321554	464.86	147.202	425.545	20.2424	423.53	6.11559	420.251	7.62045	98	20353	0.0439787	115733	228870	28309.3	114104	22689.2	2750.96	16206.7	1868.02	7558.98	974.626	1562.66	120.749	436.894	37.8966	3132.83	0.438583	0.797714	0.100799	20587.7	2023.92
44069		0.0543239	0.00286394	0.518366	0.0253463	0.0213248	0.000289815	0.0688506	0.00105611	0.313707	383.385	118.507	424.059	16.9524	426.49	5.7355	429.227	6.3738	98	25362.1	0.0477893	110076	211689	25945.2	106469	22123	2710.37	16695	2080.67	9007.07	1179.63	1958.17	162.173	647.903	55.4495	4003.32	0.431159	0.913128	0.0729881	32437.3	4474
44069		0.0548933	0.003022	0.51311	0.0282009	0.0215234	0.000319046	0.0679404	0.00114921	0.307765	409.31	124.062	420.538	18.9266	430.42	6.31277	423.735	6.94074	99	24523.8	0.0208915	112030	220769	27545.4	111189	22960.7	2827.37	16675.7	2026.7	8724.46	1127.87	1927.84	151.375	594.178	51.3698	3852.63	0.441745	0.669599	0.10606	27568.9	2960.6
44069		0.0557447	0.00293146	0.525846	0.0282039	0.0209766	0.00031097	0.0682736	0.00115864	0.316406	442.64	116.655	429.049	18.7707	419.598	6.15627	425.746	6.9955	99	24178	0	111808	219243	27030.6	111165	23026.4	2815.53	16871.6	2081.1	8668.48	1150.1	1892.54	155.069	602.362	51.5062	3851.58	0.436709	0.843579	0.0650923	28111.1	2963.5
44069		0.0564881	0.00385078	0.526702	0.0309131	0.0216157	0.000304271	0.068136	0.00134844	0.337192	472.265	147.202	429.618	20.5618	432.246	6.01987	424.916	8.14134	98	20687.2	0.0229229	112833	225261	28021.4	112444	23111.8	2751.01	16235.6	1895.28	7747.97	991.824	1627.71	125.833	460.556	39.9159	3245.84	0.434175	0.593333	0.173992	20794.6	2078.51
44069		0.0541499	0.00288305	0.512254	0.0256661	0.0208843	0.000332678	0.068078	0.00109291	0.320408	375.98	120.358	419.964	17.2355	417.771	6.58661	424.566	6.60028	98	27060.6	0	107162	210782	25777	105013	22592.1	2755.13	17432.8	2171.48	9349.14	1241.44	2115.1	176.117	725.467	65.7666	4323.89	0.424428	0.58165	0.23094	30821.4	4161.44
44069		0.0560856	0.00348508	0.509367	0.0290068	0.0208428	0.000346635	0.066921	0.00124175	0.325838	457.45	132.393	418.024	19.5156	416.949	6.86322	417.579	7.50611	99	20139.5	0	114162	228338	27976.1	110230	22740.2	3109.11	16444.6	1903.74	7720.54	946.239	1401.89	95.2191	329.703	26.3888	2799.44	0.49153	0.555391	0.119772	22405.6	2286.22
44069		0.0545524	0.00281751	0.529589	0.0264591	0.0216572	0.000331802	0.069293	0.00123247	0.355999	394.495	116.655	431.537	17.5668	433.067	6.56429	431.895	7.4338	99	23445.7	0.0443633	112010	219678	26557.2	105686	22348.4	3075.44	16973.5	2038.45	8553.11	1074.64	1681.06	122.006	417.127	35.2015	3330.04	0.48275	0.877192	0.279569	31812.5	3312.42
44069		0.0519843	0.00316554	0.493618	0.0301539	0.0209882	0.000333354	0.0676061	0.0011875	0.287538	283.395	138.87	407.373	20.5009	419.828	6.59932	421.717	7.17397	96	22229	0	141735	253882	30027.3	125208	23937.2	2883.03	18003.8	1986.87	8247.98	1022.21	1616.95	132.018	513.466	46.325	3330.97	0.424575	0.875421	0.13644	28842.8	3230.08
44069		0.0586537	0.00358486	0.545338	0.0308094	0.0215118	0.000350476	0.0686079	0.00136789	0.352906	553.74	133.315	441.938	20.2459	430.191	6.93472	427.763	8.25507	96	22133.6	0.0527092	142115	251757	29467.5	122942	23005.4	2790.68	17539.5	1935.19	8168.4	1004.94	1630.08	133.505	532.614	49.0794	3350.22	0.424727	0.662061	0.178826	26608.9	3174.75
44069		0.055555	0.0026448	0.517834	0.0244779	0.0208294	0.000283689	0.0677769	0.00110783	0.345786	435.23	107.397	423.704	16.3775	416.684	5.61699	422.748	6.6921	99	27434.2	0	123115	238447	29444.9	128435	25726.6	3275.61	20175	2359.26	10031.9	1268.31	2018.07	168.969	661.146	58.5364	4175.03	0.439559	1.27168	0.165259	39195.3	4221.6
44069		0.055083	0.00305738	0.521122	0.0289901	0.0216706	0.000323562	0.0684371	0.00121078	0.318026	416.715	156.463	425.9	19.3537	433.332	6.40119	426.733	7.30887	99	23742	0	137301	247001	29682.9	126068	24075.2	2949.68	17997.1	2089.62	8723.11	1097.28	1703.87	146.883	579.32	51.6136	3578.97	0.433224	1.29719	0.150755	31285.8	3457.28
44069		0.0576808	0.00337395	0.546487	0.0293182	0.0211246	0.000329969	0.0692587	0.00115977	0.312134	516.705	129.613	442.692	19.2519	422.527	6.53144	431.688	6.99599	97	22648.7	0.0835193	141400	249580	29160.6	123990	23234.9	2893.27	17701.6	1998.93	8210.62	1028.53	1602.8	142.198	550.578	49.1676	3373.27	0.43615	0.580441	0.0866423	27664.3	3340.28
44069		0.0529572	0.00316367	0.492469	0.0292569	0.0213754	0.000328843	0.0669553	0.00122322	0.307518	327.835	135.165	406.592	19.9065	427.492	6.50756	417.786	7.39399	97	22584.1	0.0274862	144303	249506	29039.4	120497	23107.5	2748.37	17524.3	1948.99	8034.6	1011.06	1595.59	133.117	557.374	47.542	3344.68	0.417543	0.572891	0.0605631	27510.9	3440.43
44069		0.0535671	0.00351747	0.494898	0.0305767	0.0210907	0.000307021	0.0674114	0.0012133	0.291314	353.76	148.127	408.243	20.7705	421.857	6.07739	420.542	7.33102	97	22418.8	0.0267412	134972	255885	30052.5	131193	24950.5	3079.15	18601.2	2078.51	8425.3	1047.04	1627.06	133.558	523.356	46.7613	3377.78	0.436964	1.33517	0.13824	29296.2	2916.17
44069		0.0570709	0.00355958	0.544058	0.0332692	0.0214093	0.000356385	0.0688026	0.00127213	0.302363	494.485	138.87	441.096	21.8801	428.162	7.05235	428.937	7.67624	97	21850	0	138875	249043	30045.2	126878	23884.7	2859.04	17978.3	2009.77	8170.34	1023.25	1573.95	129.238	514.204	46.3904	3287.03	0.421803	1.0645	0.111357	29049.5	3121.21
44069		0.0516395	0.00283113	0.493151	0.0256532	0.0211483	0.00031244	0.0696912	0.00123907	0.341788	333.39	125.907	407.056	17.4471	422.997	6.18431	434.295	7.47085	93	23785.2	0	142841	246428	28721	125969	24299.5	2958.93	19107.8	2109.66	8586.53	1096.9	1693.45	145.558	595.785	52.1577	3583.85	0.419813	0.606043	0	28290.6	4210.37
44069		0.0589985	0.00318419	0.545805	0.0295156	0.0213517	0.000292987	0.0665228	0.00116564	0.324027	568.55	112.02	442.245	19.3901	427.023	5.79813	415.173	7.04911	93	18537.7	0	149158	245154	28574.2	124850	23118.5	2627.33	17433.8	1809.71	7126.87	875.107	1314.99	107.771	437.71	36.6625	2772.24	0.400094	1.40171	0.0973464	32261	3509.48
44069		0.056737	0.00276576	0.53364	0.0247692	0.0215091	0.000292811	0.0683055	0.00116222	0.366582	479.67	109.248	434.223	16.4017	430.137	5.79374	425.939	7.01691	98	23853.8	0	108777	213489	25979.2	100946	22188.9	3000.07	16699.9	2006.66	8441.48	1071.92	1685.21	119.169	420.767	36.9666	3334.04	0.476463	0.990341	0.166702	31256.9	3489.07
44069		0.053901	0.00298517	0.505316	0.027701	0.0209909	0.000310813	0.0679085	0.00123666	0.332194	368.57	125.915	415.294	18.6873	419.882	6.15306	423.543	7.46857	98	22876.7	0	110511	217000	25940.6	100893	22227.3	2914.66	16232.9	1974.78	7935.85	1015.42	1574.3	114.606	395.139	32.5991	3132.06	0.469106	1.02222	0.0775846	31569.1	3067.15
44069		0.0575314	0.0036857	0.52863	0.0315879	0.0212016	0.000342337	0.067021	0.00133582	0.333555	522.26	145.35	430.9	20.9841	424.053	6.77574	418.183	8.07351	97	22887.2	0.0508509	128086	245635	30791.6	128365	24163.2	2947.16	18564.3	1992.62	8516.23	1027.25	1615.38	130.866	493.189	46.316	3312.99	0.425413	0.377645	0.150443	26354.3	2363.65
44069		0.0531066	0.00320608	0.510326	0.0283434	0.0212984	0.000285884	0.069193	0.00122803	0.319553	331.54	137.02	418.668	19.0572	425.967	5.65785	431.292	7.40776	97	23242.3	0.0758368	127511	236625	29608.8	125325	24799.2	2992.35	20545.1	2141.74	8828.11	1036.16	1640.32	128.071	482.515	44.0972	3331.16	0.405287	1.18704	0.0815471	28496.3	3470.96
44069		0.0560781	0.00348494	0.527723	0.0324244	0.0209812	0.000305913	0.0675408	0.00135398	0.326273	453.75	132.393	430.297	21.5525	419.689	6.05611	421.323	8.17927	97	23088.3	0	128878	245814	30659.6	130210	24678.3	3034.4	19546.3	2086.73	8937.86	1067.6	1673.85	132.531	496.858	44.227	3415.07	0.422383	0.89087	0.0976026	28044.2	2697.36
44069		0.0545599	0.00323237	0.511233	0.0293623	0.0215188	0.000340916	0.0686732	0.0014406	0.365245	394.495	133.32	419.278	19.7303	430.33	6.74552	428.157	8.69299	97	22880.6	0	128083	242487	30147.6	127224	24273.9	2902.14	18582.7	1991.66	8609.43	1054.47	1677.86	134.343	512.91	46.2615	3425.84	0.417751	0.875762	0.161205	27840.8	2353.34
Trebilcock		0.0492349	0.00324957	0.291372	0.0175376	0.0138144	0.000192773	0.0437796	0.00073592	0.279277	166.75	138.865	259.639	13.7907	277.309	3.84327	276.218	4.54751	93	22491.7	0	72086.1	179038	23729.9	98739.4	38634	158.504	24194.8	2955.84	9300.64	821.348	1158.98	94.3771	383.049	31.0241	2488.78	0.0158496	0.99712	0.0876093	123200	4727.61
Trebilcock		0.046927	0.00304536	0.287619	0.0164331	0.0136782	0.000180548	0.0450737	0.000789532	0.30658	55.65	138.875	256.683	12.9599	274.594	3.60004	284.206	4.87255	89	21961.6	0.0302349	70884.6	179075	23739.8	97593.3	37755.9	152.794	24234.8	2879.36	9404.43	813.999	1131.99	92.7204	388.262	30.5742	2457.55	0.0154425	0.734581	0.0626809	120728	4612.74
Trebilcock		0.0465003	0.00296155	0.277754	0.0165839	0.0135363	0.000172004	0.0436612	0.000731036	0.280425	33.43	135.17	248.874	13.1797	271.764	3.43014	275.487	4.51786	89	21853.2	0	71799.4	177970	23808.2	96513.1	37860.4	157.047	24096	2854.42	9319.4	804.634	1128.99	93.2918	391.123	30.7582	2448.79	0.015896	1.12147	0.136466	120980	4626.84
Trebilcock		0.0508701	0.00361738	0.298322	0.0160421	0.0132493	0.000161153	0.0432853	0.000729011	0.313197	235.25	164.792	265.089	12.5474	266.04	3.21467	273.164	4.50694	96	25121.8	0.159504	79273.8	193142	25901.7	114426	43723.7	169.62	28238	3282.05	10554.3	932.642	1241.12	107.619	442.137	31.8141	2755.33	0.0147579	1.37962	0.12327	135955	4951.56
Trebilcock		0.0575058	0.00345338	0.348568	0.0209254	0.0135552	0.000170167	0.0432037	0.000726551	0.28013	509.3	133.315	303.643	15.7568	272.141	3.39346	272.661	4.49209	89	24910.3	0	80177.1	192405	25916.5	113938	43460.4	178.192	28055.2	3232.8	10514	907.227	1213.69	102.991	451.313	34.1564	2709.37	0.0156012	1.07151	0.147723	134507	4837.02
Trebilcock		0.0533951	0.00309885	0.316671	0.0181761	0.0135206	0.000175498	0.0430362	0.000762623	0.308733	346.35	131.468	279.338	14.0182	271.451	3.49988	271.625	4.71562	97	25004.4	0.0843771	79615	193826	26031.6	113219	43178.6	171.465	28354.9	3277.13	10587.6	924.738	1242.52	108.263	434.002	35.1508	2744.67	0.0149813	1.34202	0.130294	136192	5040.18
Trebilcock		0.0510518	0.00284896	0.297771	0.0150983	0.0134547	0.000187809	0.0433431	0.000821169	0.373652	242.66	129.61	264.658	11.8144	270.137	3.74564	273.522	5.07583	96	22231	0.100418	69641.6	174991	23009.3	89938.4	37955.9	148.093	23754.7	2803.21	8971.34	792.458	1122.82	91.6447	387.231	30.3494	2424.51	0.015078	1.32276	0.0999965	116451	4223.17
Trebilcock		0.0508598	0.00318874	0.30464	0.0177913	0.0133428	0.000175853	0.043582	0.000735037	0.28879	235.25	144.425	270.018	13.8479	267.904	3.50759	274.998	4.5429	98	22076.6	0	69620.6	174225	23179.8	90244.5	37354.7	148.041	23652.4	2837.49	8909.69	796.598	1106.86	93.6732	364.08	29.2909	2390.5	0.0152263	1.49967	0.0823089	116360	4152.36
Trebilcock		0.055067	0.00335459	0.319673	0.0179348	0.0133215	0.000181666	0.0428051	0.000769957	0.320612	416.715	137.023	281.651	13.8007	267.48	3.62361	270.197	4.76195	95	22061.1	0.0954274	69832.5	174970	22914.9	90392.8	37394.4	143.182	23608	2830.4	8959.65	801.558	1114.88	89.849	368.523	29.9256	2404.73	0.0147326	1.19596	0.0712051	115238	4175.12
Trebilcock		0.0527095	0.00308388	0.31456	0.0172803	0.0134874	0.000179855	0.0428778	0.000678663	0.28812	316.725	133.315	277.709	13.3488	270.789	3.5869	270.647	4.19762	97	25476.8	0.0522738	77444.3	186031	25534.2	106769	41374.1	158.102	28711.7	3195.86	10762.5	910.669	1240.17	105.756	408.613	30.9128	2696.12	0.0140239	1.39424	0.0104525	134799	4870.99
Trebilcock		0.0504568	0.00317925	0.296932	0.0169908	0.0133369	0.000174444	0.0429886	0.000716423	0.291246	216.74	150.905	264.001	13.3035	267.787	3.4795	271.331	4.43043	97	25272	0.0542909	77573.4	185657	25504.3	106076	41257.9	170.395	28541.2	3141.73	10494	889.944	1209.76	101.446	419.324	32.769	2653.24	0.0151806	0.868544	0.0486015	134778	4777.26
Trebilcock		0.052037	0.00308222	0.306936	0.0161248	0.0132017	0.000181396	0.0436248	0.000758455	0.330942	287.1	135.167	271.804	12.529	265.09	3.61865	275.262	4.68729	98	25165.9	0.0582913	78446.3	188659	25715.3	106688	41650.2	164.17	28723	3188.42	10570.9	905.197	1232.4	103.061	407.705	33.5371	2681.9	0.0145109	1.11869	0.0782358	135722	4824.26
